# Supplementary material for: Deep Sequencing Reveals the Complete Genome and Evidence for Transcriptional Activity of the First Virus-Like Sequences Identified in Aristotelia chilensis (Maqui Berry)
Source: Viruses. 2015 Apr 3;7(4):1685–99. doi: 10.3390/v7041685 (PMC4411674; doi:10.3390/v7041685)
Supplement: Supplementary File 1 [file viruses-07-01685-s001.fasta]

>AcV1 2540: 4816  MW: 88635.99 Protein_RT
MNPEHLKLAKEELQQLTNEGLIENTTSPWACEAFYVNKRAEQVRGKLRLVINYQPLNNFL
ADDKFPLPRRNTLFSQLSNAHVFSKFDLKAGFWQLGIHPDERPKTGFCITDHHYQWKVMP
FGLKTAPSLFQKAMIKIFSPILTNALIYIDDILLFSHSQEAHIQILYQFHQLCLQYGIML
SEKKMIIGTETVDFLGMHIHKGQYSLQPHIAKQLEDFPDENLTKKQVQQFLGIVNYMTDF
IKGLTPVIRPLQQILKKNPLAWTNVQTAAVRKIKALTQNLPAQQIPSNGKRILQTDASDE
YWGAILLEERDNHRQICGYKSGHFKDSEKHYHSTFKEILAVKRGIEKFQIHLIGHHFQXE
MDMSSFPRMLHFKQKTIPNSQLLRWAXWFSRFDFQVKHIKGKNNTLPDMLTRPPLRKFKN
TMSYITSPVPIITMMEDYSTFQFFPPEIQELIATKTIQTRAKDLMFKYQSICIRESGPYF
LGSSGVSGLHPDYPFIQTFVFLPDFILTKPILCFLWYLLSVHTITFQIPVTTFLYKIDQI
FASKGIFHPQYTITQPDLDNQLSFMKTFLEWFHPLHWWKHQFLYIKMNQSQLYKESASNE
IYAIVFFTRHVFHHQLSNLIFMPKTEEYKVFPFPVADQGLLQSPNQQKALRELQHILCEK
NGKVPKEIWPSYSDSPPWEKFHPHRHTTFQQDYDVWFKTLPQPSQPTDSLLEDSASSSSA
FQDSHVLYPDDSAAEQNRLYWQGLSDIEYDNIINQMEK

>CitPRV gb|AHC13200.1|:1236-1664 polyprotein [Citrus endogenous pararetrovirus]
MSPSDLLLAQQECSQLLAQGLIEPTTSQWACQAFYVEKHSEIVRGKKRLVIDYQPLNMFLQDDKFPLPRR
QSMFTFLKNAQIFSKFDLKSGFWQLGIEPSERYKTAFCIPNAHFQWTVLPFGLKTAPSIFQKSMIKIFQP
LLSNALIYIDDILLFSGSHDDHHRLLNQFYDIVHSHGIMLSAKKSTIATDTIEFLGMIIKDGHYQPGKHV
AQELLHFPDQQLSKKQVQQFLGIINYIRDFIPHVDHYTRHLSALLKKKPPEWNDDHTNAVTTLKKIAQNP
PPKHQTHPTKKILQTDASDQYWSAVLLEEHNGKRHFCAHASGQFKHSEKNYHVIYKEILTVKYGIKKFEF
HLISHTFLINMDNSSFPRIFDFKNKLLLDKQLLNLKTWFAKYDFTVQHIKGNQNLIPDFLTRPAINKPSL
ISSIQTIPV

>DMVePRV-D10-DR gi|526481145|gb|AGR88238.1| reverse transcriptase [Dahlia mosaic virus]
MSSILERLEQIFDEQLEICSVEQINELVQLMTLTDQECEQRFSENKDLRNSNLLDKYFSKIQFLENKEKV
FKITKTKEENSLKEGHYANECPNRQQSPEKVKLIKEAEKEGYYPSENIFDDYTQVYSLKIYQSSTDSDSS
SDISSSSTVNLRERIYNYEQVHCCQNELLYSNISNSNFIYIKGNIFLIGYITLTLHCYVDTGRSLCLASK
HVIPEDIREETSKDIKVTIINPDTIKLAKVGRNLIVYFSGEPFHIPILYQQETGIPLLLENTFCQLYGPF
SQWIDRISFHLNEGMILIKTLTKASQIGKTSFLESMKIDSLAKQIPGTNITQEVIKPERFFLEIKRYQKI
EELLEKLCSENPIDPEKSNCWMNASLELIDPKTVVREKPMKYSPQDREEFGKQIKELLEVKLIIPSKSGQ
MSPGFLLENEAERRRGKKRMVENYKAINAATKGDSHNLPCIQELLSRLRLKRCFSIFEQSHGFWQVLINQ
EPRLLTAFTSPDGHYQWRVVLFGLKQAPSIYERQKQNALRGLENYCTVYVDDIILFSDSVEKQYSHVLSV
FKTTESYGIIRSSIKTNLFNPMINYLSYHIYQGTHCPLKHILENLHKFQNTLEDKKHFPRYLGVLTYAES
YIQKLADLWKLLQVKLKTDYVWKWKQSDTRNNIQIKKILTRFPKLYLPKEKEFLIIETDSSNDYWRGVLK
ANTDAKEEVCTYPTGSFKTGERIYDSNYNELLIIKNIISKFSIYLTPVKFLVSTDSRNFTYFLKTKILGD
NKQGRLVRWQMWFSRYFFDIEHIEGEKNVLADCLTRDFQN

>DMVePRV-D10-NZ gi|530721677|gb|AGT41978.1| reverse transcriptase [Dahlia mosaic virus]
MSSILDRLDKIFFDLLEIRPIEQIRELVQLMSSTEQECEQQFSENKDLKNKYLSDKYFSEEKILENKEKV
FKINKPITKEENSLEEKVQVIKKKHCANECPNRQQFPKKVKLISEAKTEGYYPTENIFNDYMQVYSLKEQ
ESLTDSDNSSDSSSSQKFNLGKKKDNDEQVQRKNESELAYSNITNPNSIYIKGKIFLKEYKTITLHCYVD
TGASLCLASKHVIPDDLWENTPKDIKVTVANQETIKLDKVCRNLIVYFSGEPFPIPTIYQQESRIDLLLG
NNFCQLYGHFTQWLDRISFHLNHEMILIKKITKAFQIGKPGFLESMKKDSKIKQIPGTNITQEVIKPEEI
YFRELQRYQKIEELLENVCSENPIDPNKSKNWMDGSIQLIDPKTIIRVKPMKYSPQDREEFGKQIKKLLD
LKLIIPSKSPHMSPAFLVENEAKRRRGKKRMVVNYKAINAATKGDSHNLSCMQKLLTLLRGKTIFSTFDC
KSGFWQVLLNEESQLLTAFTCPDGHYQWKVVPFGLKQTPSIFQRHMQNALRGLENYCTVYVDDIIVFSDS
EEKHYFHVLSVLKTIEKYGIILSKKKANLFKTKINFLGLEIDQGTHCPQKHILENLHKFPDTLEDKKHLQ
RFLGVLTYAESYIPKLAELRRPLQVKLKKDFVWEWKQSDTNYVKKIKKNLTSFPKLYLPNKEDFLIIETG
ASNEFWGGVLKVKTAETEEICKYTSGSFKTAEKNYHSNEKELLAVKNTISKFSIYLIPVKFLVRTDNRNF
TYFLKTKISGDNKQGRLVRWQMWFSRYSFDIEHLEGPKNVLADFLTRDFQSNSPL

>PVCV gi|14575753|ref|NP_127504.1| ORF I polyprotein RT [Petunia vein clearing virus] ac no. NC_001839.2
DLIEPSDSQWACEAFYVNKRSEQVRGKLRLVINYQPLNHFLQDDKFPIPNKLTLFSHLSKAKLFSKFDLK
SGFWQLGIHPNERPKTGFCIPDRHFQWKVMPFGLKTAPSLFQKAMIKIFQPILFSALVYIDDILLFSETL
EDHIKLLNQFISLVKKFGVMLSAKKMILAQNKIQFLG

>CaMV gi|840738|emb|CAA55974.1| ORF V Reverse transcriptases (RTs) [Cauliflower mosaic virus] X79465
MMDHLLLKTQTQTEQVMNVTNPNSIYIKGRLYFKGYKKIELHCFVDTGASLCIASKFVIPEEHWVNAERP
ILVKIADGSSITISKVCKDIDLIIAGEIFKIPTVYQQESGIDFIIGNNFCQLYEPFIQFTDRVIFTKNKS
YPVHIAKLTRAVRVGTEGFLESMKKRSKTQQPEPVNISTNKIENPLEEIAILSEGRRLSEEKLFITQQRM
QKIEELLEKVCSENPLDPNKTKQWMKASIKLSDPSKAIKVKPMKYSPMDREEFDKQIKELLDLKVIKPSK
SPHMAPAFLVNNEAEKRRGKKRMVVNYKAMNKATIGDAYNLPNKDELLTLIRGKKIFSSFDCKSGFWQVL
LDQESRPLTAFTCPQGHYEWNVVPFGLKQAPSIFQRHMDEAFRVFRKFCCVYVDDILVFSNNEEDHLLHV
AMILQKCNQHGIILSKKKAQLFKKKINFLGLEIDEGTHKPQGHILEHINKFPDTLEDKKQLQRFLGILTY
ASDYIPKLAQIRKPLQAKLKENVPWRWTKEDTLYMQKVKKNLQGFPPLHHPLPEEKLIIETDASDDYWGG
MLKAIKINEGTNTELICRYASGSFKAAEKNYHSNDKETLAVINTIKKFSIYLTPVHFLIRTDNTHFKSFV
NLNYKGDSKLGRNIRWQAWLSHYSFDVEHIKGTDNHFADFLSREFNKVNS

>CERV gi|58863|emb|CAA28360.1| ORF V Reverse trancriptase [Carnation etched ring virus] X04658.1
MSLRNRTNPNSIYVKGILKFPGYQTNLDLHCYVDTGSSLCMASKYVIPEEYWQTAEKPLNIKIANGKIIQ
LTKVCSKLPIRLGGERFLIPTLFQQESGIDLLLGNNFCQLYSPFIQYTDRIYFHLNKQSVIIGKITKAYQ
YGVKGFLESMKKKSKVNRPEPINITSNQHLFLEEGGNHVDEMLYEIQISKFSAIEEMLERVSSENPIDPE
KSKQWMTATIELIDPKTVVKVKPMSYSPSDREEFDRQIKELLELKVIKPSKSTHMSPAFLVENEAERRRG
KKRMVVNYKAMNKATKGDAHNLPNKDELLTLVRGKKIYSSFDCKSGLWQVLLDKESQLLTAFTCPQGHYQ
WNVVPFGLKQAPSIFPKTYANSHSNQYSKYCCVYVDDILVFSNTGRKEHYIHVLNILRRCEKLGIILSKK
KAQLFKEKINFLGLEIDQGTHCPQNHILEHIHKFPDRIEDKKQLQRFLGILTYASDYIPKLASIRKPLQS
KLKEDSTWTWNDTDSQYMAKIKKNLKSFPKLYHPEPNDKLVIETDASEEFWGGILKAIHNSHEYICRYAS
GSFKAAERNYHSNEKELLAVIRVIKKFSIYLTPSRFLIRTDNKNFTHFVNINLKGDRKQGRLVRWQMWLS
QYDFDVEHIAGTKNVFADFLQENTLTNYV

>FMV gi|20143429|ref|NP_619548.1| ORF V Reverse transcriptase [Figwort mosaic virus] acc no. NC_003554.1
MTSSSLFREGELGHFCLNKQEMLHLNVTNPNSIYIEGKLSFEGYKSFNIHCYVDTGASLCIASRYIIPEE
LWENSPKDIQVKIANQELIKITKVCKNLKVKFAGKSFEIPTVYQQETGIDFLIGNNFCRLYNPFIQWEDR
IAFHLKNEMVLIKKVTKAFSVSNPSFLENMKKDSKTEQIPGTNISKNIINPEERYFLITEKYQKIEQLLD
KVCSENPIDPIKSKQWMKASIKLIDPLKVIRVKPMSYSPQDREGFAKQIKELLDLGLIIPSKSQHMSPAF
LVENEAERRRGKKRMVVNYKAINQATIGDSHNLPNMQELLTLLRGKSIFSSFDCKSGFWQVVLDEESQKL
TAFTCPQGHFQWKVVPFGLKQAPSIFQRHMQTALNGADKFCMVYVDDIIVFSNSELDHYNHVYAVLKIVE
KYGIILSKKKANLFKEKINFLGLEIDKGTHCPQNHILENIHKFPDRLEDKKHLQRFLGVLTYAETYIPKL
AEIRKPLQVKLKKDVTWNWTQSDSDYVKKIKKNLGSFPKLYLPKPEDHLIIETDASDSFWGGVLKARALD
GVELICRYSSGSFKQAEKNYHSNDKELLAVKQVITKFSAYLTPVRFTVRTDNKNFTYFLRINLKGDSKQG
RLVRWQNWFSKYQFDVEHLEGVKNVLADCLTRDFNA

>DaMV gi|523580597|gb|AGQ49469.1| reverse transcriptase [Dahlia mosaic virus] KC845546.1
MSSILDRLDKIFFDLLEIRPIEQIRELVQLMSLTEQECEQQFSENKDLRDKYLSEDKFLENKEKVSAINE
LKTKEENSLEEKVQVPEKGHYANKCPNKQESPKKVKLISEAETEGYYPTENIFNDYMQVYSLEEHESLTD
SDNSSDSSSSQKFNLGKKKDNDEQVHCCQNELVYSNITNPNSIYIKGKIFLKGYKTITLHCYVDTGASLC
LASKHVIPEDLWENTPKDIKVTIANQETIKLDKVCRNLIVYFSGEPFPIPTIYQQESGIDLLLGNNFCQL
YGPFTQWIDRISFHLNQEMILIKKITKAFQIGKTGFLESMKKDSKTKQTPGTNITQEVIKPERFFLEIQK
YQKIEDLLEKVCSENPIDPEKSKYWMNASIELIDPKTVVRVKPMKYSPQDREEFGKQIKELLDLKLIIPS
KSPHMSPAFLVENEAERRRGKKRMVVNYKAINAATKGDSHNLPCMQELLTLLRGKTIFSTFDCKSGFWQV
LLNEESQLLTAFTCPDGHYQWRVVPFGLKQAPSIFQRHMQNALRGLENYCTVYVDDIIVFSDSEEKHYFH
VLSVLKTIEKYGIILSKKKANLFKTKINFLGLEIDQGTHCPQKHILENLHKFPDTLEDKKHLQRFLGVLT
YAESYIPKLAELRKPLQVKLKKDYVWEWKQSDTNYIKKIKKNLTSFPKLYLPKEEEFLIIETDASNDFWG
GVLKAKTADKEEVCRYTSGSFKTAEKNYHSNEKELLAVKNTISKFSIYLTPVKFLVRTDNRNFTYFLKTK
ISGDNKQGRLVRWQMWFSRYSFDIEHLEGSKNVLADCLTRDFQN

>SVBV gi|9628905|ref|NP_043933.1| ORF V reverse transcriptase [Strawberry vein banding virus] NC_001725.1
MENNLQLLEELNHLEEGWEMLTDEDFKLQQNEDEEQLLESVDSEERFSTLTKTNPNSIYIRGNFYFKGYK
KYSLDLYVDTGASMCTANKHVIPEEFWVNAKNPIRARIANDSIMTFNKVAELMQVQIADETFIIPTLYQA
TTKGDITLGNNFCRLYEPFVQYKDMITFHKDGRAVSTKKVTKAYFHGLPGFLESKKVGSSTSTPNPENIT
PVTINQDNISKIFKGEEIGESEQLFSTISAYTEVEKLLDSICSEHPLDSRINKGKFEAQIALLDTNKIIK
CKPMQYSPQDREEFKTQIEELLKLGIIRPSKSPHSSPAFMVRNHAEIKRGKARMVINYKKLNDHTKGDGY
LLPNKEQLLQRIGGKTFYSSFDCKSGFWQVRLAPETIQLTAFSCPQGHYEWLVMPFGLKQAPAIFQRHMD
ESLSNMYPQFCAVYVDDIIVFSKTEEEHLGHVKIVLNRCKALGIVLSKKKAQLCKTTINFLGLVIERGNL
KVQSHIGLHLVAFPDQLSDRNALQRFLGLLNYISAYFPKIANLRSPLQVKLKKEITWSWTEKDTETVRKI
KSLVKTLPDLYNPSPEDKPIIECDASDDHWGAILKAKLPEGKEVICRYASGTFKPAEKNYHSNEKEILSI
IKAIKAFRAYILPYKFLVRTDNTNAAYFVRTNIAGDYKQSRLVRWQMALREYSFDIEHVSGQKNVLADIM
TRELAGKT

>RTBV gi|222575|dbj|BAA01608.1| ORF 3 RT 46K polypeptide [Rice tungro bacilliform virus] D10774.1
MNIEYPYSIHIIDKNKVPIYDQGNLFHTEKSARLSHVSRGLLDHLFTFSSDNTERVRKLHILADYLYLLE
SERESYKNEWISLNDQVSLLQKQNSELRARIATNKEIIEGLREPVKKPIYTTQDKERLRVFFCEERSMEY
IYYHIKRLAQQSYYSHLNKLQKDCEPFRGVYMSFLTNVKFLVLCEAGYWTVPDIETNTTESLLSLSQKKG
EDLLQKGVVIFNELEGGYQLSPRFIGDLYAHGFIKQINFTTKVPEGLPPIIAEKLQDYKFPGSNTVLIER
EIPRWNFNEMKRETQMRTNLYIFKNYRCFYGYSPLRPYEPITPEEFGFDYYSWDNMVDEDEGEIVYISKY
TKIIKVTKEHAWAWPEHDGDTMSCTTSIEDEWIHRMDNA

>BRRV gi|336042317|gb|AEH95573.1| reverse transcriptase [Blueberry red ringspot virus] HM159264.1
MKSQKKKVVQMNQNNTFIKITISQKTILAYIDTGASLCLLPEYNLPKLLWKELKKPITIRVADKRELQIT
KVALMITILIEKRKFLVPTIYQFDSGVPMIIGNNFLRLYYPFCQYLSYITLRCPKMINQKQEVIKIPIHH
SSQLIKAKLLNLVTNIEEQLLMEQVNKILQERFSLDLLGEKNKNKELIEIKLKDPNAEIFVPNNIPYTQR
DIEEFKEDMEDLINKGLIRPSKSPHSAPAFYVENHSEIKRAKRRIVINYKAMNEATIGTPKTLPRSDYIM
NRLKGKIWFSTLDVKSAYWQLRLTEESKPLTAFSYPPQKHYEWNVLPMGLKQAPGIFQEFMNRSLHNLEH
ICLVYVDDIIIFSEKDKNDHLSKVLQVLKRCEDEGIILSQPKAKIAHKEIDFFGLHISEGEIILQPHILE
KLVLFPDEIENRKQLQRFLGNLNYISEKGFIKNFAKYRKELQKKVSEKVPWKWTSYDTTQVQALKALCQR
LPKLYNAKESDLLIIATDASNGHWGAVMTAVTPVYINNYGISIEDLFPKEQHTAQALSSQYQFFGTKDFV
QKELLTKYASGTFTDTEKRYPIHELETLAVLQTFRKWKVDLLSKPFILKTDSKYVTGFLRYKIKANYNQG
RLIRWQLELSQFSYRTFYIKGSENYGPDTLTREWKEL

>CsVMV gi|665934|gb|AAA79873.1| ORF III Reverse transcriptases [Cassava vein mosaic virus] U20341.1
MNKITYMTIKISIPKYMSRIYHGLFDTGANICICKKKVLPDELWHKTENLVLRGFNDEKHVAEYRADNIT
IMIAKEKFIIPYIYAMDEMSPDIIIGATFYNKYSPIELDIGKGIIKFTKNNEKYPNYLVKYPKKRKLVPW
TKGNPSVTETMENIGINQIESRNPIEEEINQILGTDIYGENPLEKWEKHKTLAKIELKNETDNIYKPPML
YQETDLPEFKMHIEEMIKEGFIEEKTNFEDKKYSSPAFIVNKHSEQKRGKTRMVIDYKDLNKKAKVVKYP
IPNKDTLIHRSIQARYYSKFDCKSGFYHIKLEEDSKKYTAFTVPQGYYQWKVLPFGYHNSPSIFQQFMDR
IFRPYYDFIIVYIDDILVFSKTIEEHKIHIAKFRDITLANGLIISKKKTELCKEKIDFLGVQIEQGGIEL
QPHIINKILEKHTKIKNKTELQSILGLLNQIRHFIPHLAQILLPIQKKLKIKDEEIWTWTKEDEEKIKLI
QDYSKNLVIKMKYPINKEDMNWIIEVDASNNAYGSCLKYKPKNSKIEYLCRYNSGTFKENEQKYDINRKE
LIAVYQGLQSYSLFTCEGNKLVRTDNSQVYYWIKNDTNKKSIEFRNIKYLLAKIAVYNFEIQLIDGKTNI
IADYLSRYNSSDTDGRYDEANT

>PCISV gi|9627959|ref|NP_042513.1| ORF V reverse transcriptase [Peanut chlorotic streak virus] NC_001634.1
MSSKNSSFIKVKLFNKYLYAYIDTGATICLAQAKILPIKYWKKMIKPIKVRIANNKVIHIWYKAVDLVLL
LEGKRFPLPSVYQQDAGLPLILGNNFLKLYNPFIQTLETISLRCPQLEKQPSSLITTKIYNTFSLFGGVI
VNILKQQIYIAIEDEVTQLLEAICSQNPLDPQKNRNQIIVHIDLIDPTKEVNVPNRIPYTQKDIDEFREE
TSKQIELGILRQSKSPHSAPAFYVENHNEIKRGKRRLVINYKMNKATKGDAYNLDRLYLTDRESNWFSTL
DAKSGFLQLRLDEETKPLTAFSCPPQMHLEYNVMPMGLKQAPSQFQRFMDNNLRGLEDISLAYIDDIIVF
TKGTKDYHLKQVARVLIQLGNHGVILSKEKAKIAFEEIEFLGLKILKNGFIEPQKHLLEKIAEFPDQLQD
RKQIQKFLGCLNYIGEKGFFKELAKERKVLQKMLSEKLPWKWNDLATLAVKRLKQVCKNLPRLYVAKPSD
LLILTTDASDTTWGAVLMAVPNAYEEFLSFVTNNRPSDLKTFLKQKEGSSRYAEKSVPEKLNSMHDKSHG
EKAEKSVSRQTSQGRSSSQSQQSYIGSFMITKWSSGTFKPAEENYTVHEKELLAFVNALKKFQIDLRPVK
FIFQTDNSWVQGFLVNKLKETYNRGRLARWSMFIQQFDFISLHIAGKENYLADTLTREWKTSSR

>SoyCMV gi|11322953|emb|CAC16945.1| ORF V reverse transcriptase [Soybean chlorotic mottle virus] X15828.2
MNTEIVQKHRVLTKGNPNVTFIKVSIGKRNFLAYIDTGATLCFGKRKISNNWEILKQPKEIIIADKSKHY
IREAISNVFLKIENKEFLIPIIYLHDSGLDLIIGNNFLKLYQPFIQRLETIELRWKNLNNPKESQMISTK
ILTKNEVLKLSFEKIHICLEKYLFFKTIEEQLEEVCSEHPLDETKNKNGLLIEIRLKDPLQEINVTNRIP
YTIRDVQEFKEECEDLLKKGLIRESQSPHSAPAFYVENHNEIKRGKRRMVINYKKMNEATIGDSYKLPRK
DFILEKIKGSLWFSSLDAKSGYYQLRLHENTKPLTAFSCPPQKHYEWNVLSFGLKQAPSIYQRFMDQSLK
GLEHICLAYIDDILIFTKGSKEQHVNDVRIVLQRIKEKGIIISKKKSKLIQQEIEYLGLKIQGNGEIDLS
PHTQEKILQFPDELEDRKQIQRFLGCINYIANEGFFKNLALERKHLQKKISVKNPWKWDTIDTKMVQSIK
GKIQSLPKLYNASIQDFLIVETDASQHSWSGCLRALPKGKQKIGLDEFGIPTADLCTGSSSASSDNSPAE
IDKCHSASKQDTHVASKIKKLENELLLCKYVSGTFTDTETRYPIAELEVLAGVKVLEKWRIDLLQTRFLL
RTDSKYFAGFCRYNIKTDYRNGRLIRWQLRLQAYQPYVELIKSENNPFADTLTREWSKPSSS

>CoYMV gi|59050|emb|CAA37110.1| ORF 3 RT [Commelina yellow mottle virus] X52938.1
MATRRLPAVTQTDGSRTATESGVPEYEDQIRSYRNDQRRRHIWAGRGRRLLSIMPGVSSSERTLEMQMNP
EVQLQRSMNHRAEAVPAEVLYRTFHGSVNHRVYSHRSEERMMVVNGSQVDRSFIQESSFEVLSRTGIEFI
HIGVMLVRIQILHRKFAGTMALIVFRDTRWSDDRAVLAAMEIDLSEGNQIVYVLPDIMMTIKSFYRHIQI
CVMTKGYDGWQGEDNLLITRGLTGRLSNTSNVGFAYDVKAMVEHLQSNGVKAIKGEKWDAKRFHNGQWNI
EPSKVVVPMQPTEMKAVSNYDGTTSLRFSNYAAASTSKPPQYNEKDEEINEDEQEINHSLNLILNDEEST
DEDEEYYQYQRYAWSQVGDSTFYYDTDGVWEEIDRCNDLPEYVPSETSTPTIDESEAIIDEFLEHAYEQR
CDSDESLQSGDPRKYEYPTPQSSPEHLDNESRSRSSSASSTSMQDDVEEIVRLMKEMRMKKQKKKKAQQA
LSSQAQEEPIIEENIEENKQAQEEPTQEEIPTHKENQPEEIQNEEIHVFEEEPAFKHLAAQLSELVNMAE
SSGQSGVGFQPPVNAQPDVNMEGPAGYAPATSQATWSNGVNIPVKSANFRWKGPVGNFQLPSAQGKDGAM
LVFGMNYSPEVFDRWASITRNYISSFNFNDGGDKIAWMEDLLGETERKIFVSWRMRFKDEYQNLAKIANQ
DGGTQAILSQIRRIFLGEDPVLGQNTVQNIAFRKLKQLVCPNYQSIRRYLMDYLTLAAETGLMWSETEGP
AISEELFTKMPAAIGERVAQAYKIMDPTSAVNLPSRVYFTINYLTEQCKEASYMRSLKALDFCRDFPIEG
YYGRSGEKKKYTARKATKYTGKAHDNHIRVTKAKYQRKCKCYICGQEGHYANQCRNKHKDQQRVAILQSL
DLKENEEVVSADDKEEEDDEIFSVLGEEDYQEETIMVLEEDDIQQIIKEFSKFGDLSRRNVGPNFPGPAE
VQMGVLKPKSSWRRPIQATLEEINCHHNWTAISTGQLACRSCKQFLAGVQCHHCHAVYCFMCAEAYHDVQ
AEKILSKDYSFSARGKKGKAVIIEEDEIEGEFLISQLQQENQRLQKQVERLQEELMKLHREKDEALKHSE
KASRVFSTIQESDEAELNLIKEELRQFKEETRMAIAQLKEAIIVQEEDTIEERCAMILEEKHTENIYSAT
AKAEYNGLYNVKVGIKPDNMEPYYINAIVDTGATACLIQISAIPENYYEDAKVTVNFRSVLGIGTSTQMI
KAGRILIGEQYFRMPVTYVMNMGLSPGIQMIIGCSFIRSLEGGLRIEKDIITFYKLVTSIETSRTTQVAN
SIEELELSEDEYLNIAASVETPSFLDQEFARKNKDLLKEMKEMKYIGENPMEFWKNNKIKCKLNIINPDI
KIMGRPIKHVTPGDEEAMTRQINLLLQMKVIRPSESKHRSTAFIVRSGTEIDPITGKEKKGKERMVFNYK
LLNENTESDQYSLPGINTIISKVGRSKIYSKFDLKSGFWQVAMEEESVPWTAFLAGNKLYEWLVMPFGLK
NAPAIFQRKMDNVFKGTEKFIAVYIDDILVFSETAEQHSQHLYTMLQLCKENGLILSPTKMKIGTPEIDF
LGASLGCTKIKLQPHIISKICDFSDEKLATPEGMRSWLGILSYARNYIQDIGKLVQPLRQKMAPTGDKRM
NPETWKMVRQIKEKVKNLPDLQLPPKDSFIIIETDGCMTGWGAVCKWKMSKHDPRSTERICAYASGSFNP
IKSTIDAEIQAAIHGLDKFKIYYLDKKELIIRSDCEAIIKFYNKTNENKPSRVRWLTFSDFLTGLGITVT
FEHIDGKHNGLADALSRMINFIVEKNDESPYRFTSSVEDALKVCNDDHGRNLISAVINDIITVLRR

>SCBV gi|94972342|ref|YP_595725.1| ORF3 RT [Sugarcane bacilliform mor virus] NC_008017.1
MTQRVRGTGSSTITEDGALLDHQIRDYRRAQHAKHEAQRIAGQALAFLRVTSDDPREKTLEMLMQPDVEL
TRSMKKRARAFPAEVLYGPRSDDIHHKVFQGSSSQDILLIDDNQLDMTFIKEETFEQLEQAGLRYIHPGI
LAVRIQPLHPDWSGKLVFIVFRDIRDNPPRVLGAMEIDLSKGPQMVYVINSFMTTIKDFFHGIQLTVKVK
GYEGWQGEANLHIERLITARLSNTTNVYFKYKVEGVASFIKTKGIKAIEATKKSVKGIRGGEWNILPSKL
EVVMQPTKVQTTENYDGTTSFRFTNYEGASSSKPVEHNSDDEAYMALFEEEEEEDDITFLNRILSKYSTQ
QKVVGEEEFSPEEDQIISDFLGKTEEAYPAEIEEEYPALRRLEQLMKTKVVVQEIEEPSQPVEAKMSTST
GSSAMIPANMDMDGNMPGYAPAQEARGWDSGETSRRNYGGHSRKWKDESQFFNLPSAMATSGAMLVLTMG
NYAKEFDRWQSINTNLLASQTFENAEDKITRIENLLGETEKLMFQTWRMAFPTAFEAMKTQATGTNGTQN
VFSQMKRILLGEVPEQGTTNTQDAAYKRIKSLVCQEMTYPAIMRYLVGYRNLAARSGRAWVNNELTDEFF
TKLPGKLGDRVKEAFKKKYPGVERHVPAATRFTYDYLEEICTENNFQKQLRSLNFCKGFPVVNPVGTRKY
GKKYGTRKARSYRGKPHKSHVRIEKKKYLQQREKKCRCYVCGSPDHLMKDCKSPMKRQERVNLANELDIP
DGYDLVSVGYDESDIDEIYSVSENEECQAHLGLNEDEQLPKVPQTFEEWEEYYKDEFIMMADIEESENSD
EEKGPFLVGPKGGFRHQMEVSYKQYKCEHDWDFTRTRVKPCKRCLKTVTKGQYIYCRTCKITVCHECSEF
CYNIKIEGAEAVKPPEKKSNYELLAKQLLIENSKLKMEKEILIEELNKEIKAHQETKKGKELYIEEASTE
VENEIETWKSRAELFEALYNEEVKKNKASTSSVTEGMYQVQIDHLRKELREVEATLEVNKVEESEEEAEE
VMMASAVKDEMYRFPVIIEVPEVGKVQLTALLDTGATRSCINQVFIEEKFLQPTKFKVKIHGVNSVTKLD
RQVKDGAKLWAGENWFRLPITYVGPMYMGEKTQMLIGCNFMQSLAGGVRLEGRTVTFYKYIASIKANEYL
QAEAEEILVATSEQEFINRSFMSKNKRLLEEMKEQGYMGEDTLAHWNKNQIKCKIELRNPDLIIKDKPQT
LLNIQKKEAMRKHIDALLERKVIRPSKSPHRTNAFIVESGTSIDPKTGKEIRGKPRLVFNYKRLNDNTWP
DQYSLPGINALLKNVARAKIFSKFDLKSGFHQVAMDEESIPLTAFSAYNELYEWLVMPFGLKNAPAIFQR
KMDQCFRGTEGFIAVYIDDILVFSEDEEQHAEHLWKMLQICKRNGLILSPSKYKIGVKKVDFLGSTIGDN
QLAVQEHIIKKIAEFDDEKLKTKEGLKSWLATLNYARNHIKDMGKLLGPLYPKTSEKGERRLNSEDWKLI
NRIKTMVRTLPNLTIPPEDAYIIIETDACATGWGAVCKWKKNKADPRNTEQICRYASGKFDKPKGTCDAE
IYGVMNGLEKMRLFYLDKREITVRTDSSAIERFYNKSAEHKPSEIRWIRFMDYITGAGPEIVIEHIKGKS
NGLADILSRLKAKLAQNEPTEEMILLTQAIREVIPYPDHPYTEQLREWGNKILDPFPTFKKDMFERTEQA
FMLTEEPVLLCACRKPAIQLVSRTSANPGRKFFKCAMNKCHCWYWADLIEEHIQDRIDEFLKNLEVLKTG
GVQTMEEELMKEVTKLKIEEQEFEEYQATPRAMSPVAAEDVLDLQDVSNDD

>CSSV gi|9627249|ref|NP_041734.1| ORF 3 RVT polyprotein [Cacao swollen shoot virus] NC_001574.1
MSRARPQHPVPSVTTTTSEQNREGPLYEDQIRDYRRGQRRIFNLRRRARRLRRSMMGSRYQETLEQEIDP
QTTLRLSMQERARLVPAEVLYRSRRDTVHHRVYTHRSEESVLCVGGSQVDRAFIQPESLEQLQRTGMSFI
HIGILQVRIQILHRQEEGTMALVVFRDNRWSGDQSIFAQMEIDLTKGSQLVFVIPDTMMTIGDFARNVQL
SILTRGYENWQNGEANLLITRGMTGRLSNTPNVAFAYQIASATDYLASHGVKAIAGKKMNLQHLRNQQWI
LRPPQTDITPMQPRSVETRNLVDGSISIRFHDYEAATSASRPHYNEEDEEVESETESEIREHTIAVWIGE
EEIPDQTGRKKVWEESSNGNGRFFRYYTPPPTFEGQIIATGWGSDDDNEKTPPKWDESPDEEGPTEPIWD
QEEEEDEYDPNVYRAYLQKEEDEWQEITASLREEMEYPKRRPQTEMAFSETVDYTPPGDTMMTPVGYPPA
SSSRSTVTTPSRPPLFEGRTTHVPRFLKRDEYTEWWQLPSSQGTTGALFVMPKQMGLFHEVFSRWESITK
NYVAAQGFTDPTEKMEFMENLLGETEKLTWIQWRMNYEAEYQQLLTQADGRQGTQNILSQIKRIFSLEDP
ASGSTRIQDAAYRDLERLTCHNIKDIVQFLNDYGRLAAKSGRLFLGTELSEKLWMKMPPELGHRMKEAFQ
KEYSGNEVGVFPRILFAYRYLEQECKDAAFKRSLKSLSFCKDMPLTGYYDKTSKYGMRKSRTYKGKPHAS
HARVEKRKHLIRNKKCKCYLCGDEGHFARECPNQRRDVKRVAIFEGIDLPEGFDIVSVEEGEEESDAIYS
ISENEDGELDTEVVHEKVFMMREEDQSYWLGKTNHWTAMVRVSSQQYHCMHQWEHNKEILVVAHINCHFC
KQPTQLRSRIHCPTCQLTSCFMCAPIYCNMIVQQQPKPPVPFNTHTLLQQQAAYIQWLEKENQRLTEAVE
FYKKEAEELRLERDLEQDRRSLEPTLLDKGKKVQILDPDEDQHTAYLEEDTISRVIGHTVEQQEVRKPVK
KGNMLYNLDVVLHIPEVGRPIKVKAILDTGATTCCININSVPQTAIEQNTFLVQFRGINSTQSVDKKLKY
GRMTISNHQFRIPYCYAFPLSLGDGIEMILGCNFIRGMYGGLRIEGHTITFYKNVTTIQTRLAAVMVGGT
TASELGGGEESKSDSESMFDLSETEEFDSETHQQIVSHVAAQAQQQKLDPKLQQLMVQLQDQGFIGENPM
QHWAKNKILCRLDIKNPDLIIEDKPIKHLTPAMEKQFQKHIKALLDIGVIRPSKSKHRTTAFIVESGTVI
DPVTKKTIHGKERLVFNYKRLNDNTEKDQYSLPGIQTILKRVGNKKVFSKFDLKSGFHQVAMAEESIPWT
AFWVPQGLYEWLVMPFGLKNAPAVFQRKMDQCFKGTEEFIAVYIDDILVFSENMAEHTKHIGIMLKICQE
NGLVLSPSKICLAQREIEFLGTVISQGQMKLQAHVIKKIVNKANIELETTKGLRSFLGLLNYARIYIPNL
GRKLSPLYAKTSPTGEKRFNRQDWHLIKEIKDMVQKLPNLAIPPARCYIIIESDGCMEGWGAVCKWKLAK
EDSRTTEKICAYASGKFGVVKSTIDAEIYALIKALESFKIFYLDKKHLVVRTDCQAIVTFYNKTSTHKPS
RIRWITFSDYITGLGVPVTIEHIDGKENQLADTLSRLVYTTWNQSQTHQPEEEELEKSQHLSFAGLAIPI
AWPMMGSYNKRRTPLLTGQSLWQRNKPSQHSSTASKSRQPRKHYWPYVTYRAYSTSRETIWPLLPLETTG
LATDCQLPNKTQPP

>Ty3 gi|536873|gb|AAA98435.1| POL3(rt) [Saccharomyces cerevisiae] M34549.1
TNVEHVRRVLTDLELESKDQQTPFIKTLPIVHYIAIPEMDNTAEKTIKIQNTKVKTLFDSGSPTSFIRRD
IVELLKYEIYETPPLRFRGFVATKSAVTSEAVTIDLKINDLHITLAAYILDNMDYQLLIGNPILRRYPKI
LHTVLNTRESPDSLKPKTYRSETVNNVRTYSAGNRGNPRNIKLSFAPTILEATDPKSAGNRGDSRTKTLS
LATTTPAAIDPLTTLDNPGSTQSTFAQFPIPEEASILEEDGKYSNVVSTIQSVEPNATDHSNKDTFCTLP
VWLQQKYREIIRNDLPPRPADINNIPVKHDIEIKPGARLPRLQPYHVTEKNEQEINKIVQKLLDNKFIVP
SKSPCSSPVVLVPKKDGTFRLCVDYRTLNKATISDPFPLPRIDNLLSRIGNAQIFTTLDLHSGYHQIPME
PKDRYKTAFVTPSGKYEYTVMPFGLVNAPSTFARYMADTFRDLRFVNVYLDDILIFSESPEEHWKHLDTV
LERLKNENLIVKKKKCKFASEETEFLGYSIGIQKIAPLQHKCAAIRDFPTPKTVKQAQRFLGMINYYRRF
IPNCSKIAQPIQLFICDKSQWTEKQDKAIDKLKDALCNSPVLVPFNNKANYRLTTDASKDGIGAVLEEVD
NKNKLVGVVGYFSKSLESAQKNYPAGELELLGIIKALHHFRYMLHGKHFTLRTDHISLLSLQNKNEPARR
VQRWLDDLATYDFTLEYLAGPKNVVADAISRAVYTITPETSRPIDTESWKSYYKSDPLCSAVLIHMKELT
QHNVTPEDMSAFRSYQKKLELSETFRKNYSLEDEMIYYQDRLVVPIKQQNAVMRLYHDHTLFGGHFGVTV
TLAKISPIYYWPKLQHSIIQYIRTCVQCQLIKSHRPRLHGLLQPLPIAEGRWLDISMDFVTGLPPTSNNL
NMILVVVDRFSKRAHFIATRKTLDATQLIDLLFRYIFSYHGFPRTITSDRDVRMTADKYQELTKRLGIKS
TMSSANHPQTDGQSERTIQTLNRLLRAYASTNIQNWHVYLPQIEFVYNSTPTRTLGKSPFEIDLGYLPNT
PAIKSDDEVNARSFTAVELAKHLKALTIQTKEQLEHAQIEMETNNNQRRKPLLLNIGDHVLVHRDAYFKK
GAYMKVQQIYVGPFRVVKKINDNAYELDLNSHKKKHRVINVQFLKKFVYRPDAYPKNKPISSTERIKRAH
EVTALIGIDTTHKTYLCHMQDVDPTLSVEYSEAEFCQIPERTRRSILANFRQLYETQDNPEREEDVVSQN
EICQYDNTSP

>AtrichAV 8241 bp endogenous-virus lcl|Sequence 1 ORF:232..5847 Frame +1
MEKFIKNLTDKTTSTTNRTLRIKNKEEIVINDIENQIQNWNIPKVPISDVYKKGTFDLKIGYAIKTVEET
LSVTNNQEDFQLLSQKILQVHKTKNYKYLHIGLIQIAVKPLTRLGLNNSILVCLRDTRHNRFSDSLLGMV
ESSLCSGPIYFNCFPNYSVSLTDPNILNVLSLNLKTQGFNMMTGSQNIAIVYRIYYKVMTTLCPNVLQID
TRGQTIFFQTNMEKSNTIVPKTISWSDIVLPQTWSIHNENQPSQNPTQNIPDKIIEYTDGNIEIQFTTNN
RIMDNASISGTSSTHSFRDPEPPRKSITTYNRIPPIINIPSTPVKPQIDELLRTPDNIIIPQYKRAQEEP
AEAEFIQVLQLEETFDKEYIIKDFLSPENKNIREWYVKEFEPRLVELFHSRFNKWRKKGNKGTCFFDWLR
DTLSQHNIPIPDFEINTLETQYTVFNTTEGNTIKAIHPPEQSLKIQGVATMVSATKTPATPEQNIGSSSS
SSTQMVVYETVATPYKLNNANIARIELLPHIIEQNNYTNLCLHTLGQQTNRIENLLHPPIYKEKKQLFFK
PPPDLNKEKFHIGDDNKTLMDQLISKLSKLEIKDPKQTIVLPDNDKGKAKIPEHDNMTLQEEILFQTNET
KEPPIVNTIENMQTAFSEIQITPDTINRINYSKNWQPINARPYYKRPTPVDIQLEEDLTSHTSTYTGRTI
IDWNIDGISDHRILDTMKHMTMYASACKMAGSHDQEIAKAIVSGFTGWLRGWWDSYLNEQTKQQILTNTR
QWTAKNEHNQDMVYSESDAVNSLIYTIALHFIGNTSILAARTADLLSNLRCPTLSHYKWYKDVFFSRLLI
REDSYLDHWKEKFVAGLPYLFAEKVKERLKNKNSGVINYSQYTLGELSSEICAEGLALCTDLKLKKQLDK
QNLSGKKELGDFCQQFGYHMDQTHIDKTKPHKIHKVYKKKKHRNKPEKTYKSFPTKQKKYRKFTKRFASK
SSQQNKKKLPVCYKCGKVGHYKSQCKVKQKLDSITLDESIRNKIYDIIQLYDSSDSSDTDTTSSSSDTSF
IGTIHNDDFYWSDISSDTEDEICQCPTTSGIHTLTKEDNLILDLIEKISDPDEKREIITKFINLTKTKTK
HMPLVKPPDNYNFSDIMKRISQHEATQKEPTIAELKAEVNIVKVELSQLKNRIQILELHDNTSEIDTDTD
VIEFNHLLKSYHPNDYLTKCESSTRHSVNVLNRVITQKWFVLITIVINDEYEFQSLALVDSGADLNCLNE
GLVPTKYFDKTTQILNTADGSRLFIKYKLSNAKICTEGHCFPTPFIMVKGLSQAVILGVPFLTLLYPVTI
SHTGIETNTHGTPIKFEFLDKPKIKEINTVKQNIKQKENFIGSLQLEIKHKIISEKLQTNDMIQKIQQLK
NFIISEICNELPNAFWHRKQHIVGLPYEPNFNETKIPTKARPIQMNTELLQTCHHEIQDLLQKKLIRPSS
SPWSCSAFYVNKNAEQERGVPRLVINYKPLNKVLQWIRYPIPNKKDLLDRLLHAVIFSKFDLKSGFWQIQ
IKEEDKYKTAFNVPFGQYEWNVMPFGLKNAPSEFQKIMNDIFNPFYKFMIVYIDDVLVFSESLEQHFKHL
HTFIHTVKNAGLVVSAKKLNLFQTKIRFLGHNINQGTIIPIDRSILFADKFPDKILDKTELQRFLGCLNY
ISDFYQNLALDAKPLYDRLKKNPPPWTDVHTLAVQRLKLKAKELPCLTLSDPTASKIIECDASELGLGGI
LKQSINSKEQLIRFTSKAWNPTQKNYSTVKKELLAIIHCVCKFQTDILNQHFLIRTDCKAAKDILQKDVQ
NLVSKQIFARWQAILSAFDFSIEHLHGSTNSLPDFLTREFLQGGPHIPITP*

>AlyrV endogenous-virus 7445 bp lcl|Sequence 1 ORF:4839..6230 Frame +3
MDSGADYNCIREGIIPTKYYEKTTEKLSGANGTNLKVQYKLPCAKVCNEGYCFTNQFILVKNLSQEIILG
TPFFTQIYPFKVSELGVTTKVVGTKLLFKFLSPIKLKEVLTLQQNTIQKTINLIKNKKEHIQSLQEEITY
KKIEEQLKTPYVLSKIKSIENDLLNQVCSDIPNAFWERKQHTVDLPYIKNFNEKNIPTKARLIQMNKEQL
EHCKKEIDDLLKKKLIRPSKSPWSCSAFYVNNQAEKERGVPRLVINYKPLNDVLQWIRYPIPNKRDLLKR
LYSAKIYSKFDMKSGFWQIQIAEKDKYKTAFIVPFGHYEWNVMPFGLKNAPSEFQHIMNDIFNNYSKFTI
VYIDDVLVYSTSIDQHISHLNTFLNVVKKHGLVLSAKKMSLFQTKIRFLGHNIYQGTITPISRSIEFADK
FSNELRDKTQLQRFLGCLNYVSDFLPDLRKTIQPLYQRLQKKT*

>CsatBV [endogenous-virus-name=Cucumis sativus B virus] [host=Cucumis sativus cv. 9930] lcl|Sequence 1 ORF:1535..3367 Frame +2
MPIQVNDLHHEVKILKKEVANNKQRLTYLENAFQAFQESPIREEYPETSTNNFERKTKEMTLLIEEPNFI
NSISKVHNQKWISKIVFKVKDFQLETLTLFDSGADQNVIQEGLVHSKYFEKTKESLTGAGGNPLNIQFKL
SKAHICKDNVCLVNTFIPVKNLNEGIILGTPFLTQIYHFHVTKEGIMSKKFDKEITFEFTQPVTPKYISN
IEEEIRQFINRIAKKEKQIEFLQDDIKGCKVTSEISKPLIQQKIQNFQQRLEKEVCSNLPNAFWDRKKHM
VTLPYKEGFKESQIPTKARPIQMNKDLVKVCTNEIKDLLKKGLISPSKSPWSCSTFYVNNQAEKERGVPR
LVINYKPLNKVLKWIRYPIPNRQDLLKRITLAKVFSKFDMKSGFWQIQIHPTQHYKTTFNVPFGKFQWNV
MPFGLKNAPSEFQKIMNDIFNPYQDFTIVYIDDILVFSNTVDQHFKHLRVFLNVIKTNGLVVSQPKIKLF
QVKIRFLGYEINQGIIKPIQRSLDFADKFPDVIQDKTQLQRFLGCVNYIGDFIRDLRSICLPLYDRLKRN
PKPWTDEHTRAVQSIKSLAKSIPCLSLVDEQAKLIIDTDASDIGYGGILK*

>VvinCV_sc1 [endogenous-virus-name=Vitis vinifera C virus][host=Vitis vinifera cv. Pinot Noir] lcl|Sequence 1 ORF:361..5640 Frame +1
MPRQEKKDIYQIGTFEFRSTYKIKVSENTHSIGSETETIELLNPKDIEILRNQKFKILHIGAIQVAIKPL
TRIGLNKPVCACLRDARHNNFDDSLLGVIESNMAHDPVYFNCFPDLELSCIDDMSIHKALTLNVQTKGYD
MDPRAKNILIVYRIYYKAMTTSVNAKCLLKPTKGKTLLFQANEEHSTVMTPVEIPWESLTHSNTWNFTQL
ALPKPIQSKKPLFITQDDKGNVTIQFPPKEIGQNSRISVQGSRTSSPPRQSFEVNSRRPSVKLDNVDFRP
NIPHPRYVMQESSPPTSPTPSQMLPPDEPHQLMVIDEVTKPFQIDKEYLSKELHLPKHKEKREWFFSTKL
TTQTRHKFRDEWYKCMERNRIDIPMFTYLEMYASNNNLDYPFLEVNTLQKGQVWKTASKTIVSNHPPLEE
VTITAQSMEVIASPFKIINPKDDERRTVTLKDCKNLQQQNNFTNQILGTISSQLDRMEDKLEEHQTSRQI
ITPHFLDRNLDKNCPIFKPVEVGNHKLKFSNDSNDLMQTLTNKIAQLDLSNKASTSNTKSVNMIEEINPE
NVEQIQAMFEENDPQINRIAHKFKQQTRTRNYYPRPTPPDLQYEERSQIVQSKYDGDDIYEWNIDGVSDH
QVLNILQEMIMASTTYKSRGNSDQAICTHLIAGFTGQLKGWWDNALTKEEKRFIQNSLDELGNQNSVHTL
IYAITKHFLGDPISFQSRSSEILQNLHCKKLSDYRWYKEVYFAKVHSRTDCNQPYWKERFLNGLPKVFSQ
RVQVRIKEMYNGIIPYDSLTYGQLANFVSQEALNLCSLIKVNATIKKDFKSAKKELGSFCAQYGYDIPLP
PSVRQEKFYKSKRKRTNKKYSKFKEEPFYRKPKHKKHKKYQNFPSKKKDEKDIKCFKCGKKGHIAPNCKI
KEIIVDLDIGKRLKRQMINLIKTESDSSSYSPMETSSDNQFLLIEESSSNESTSSSSQSSCDCVENCLCQ
IKQVNMISSESNFLIEIIENIPDKELQREYFKKYLEIQKQNNNKNPENNNQYSLKTVLDKFTSKPRSVGI
QDLQNEISQIKLQINSMIIQNEDLETRLKVLEKGKNQIVEETENIENTQLEEGESSQLFVNTITKMITQK
WHIKIKLFIKPNFSKEFIALVDSGADINYIQEGLIPVKYFEQTLQTAVGANKQPLQINYKISNVHVCNKN
ICYKISLLLVKDMNKEIILGTPFLSLLYPFRVNAKGIKTIFEGQEICFNFLSSPKIKELNSLDNQVNLIQ
KKKQQIKFLGKEIHYKKIEENLLQKEIQTRIEKIKSQIETDLCSSIPNAFWNRKKHKVSLPYVEGFDESQ
IPTKARPIQMNAQLLEYCKEEIKDLMNKNLIRKSQSPWSCAAFYVKKPSEIERGAPRLVINYKPLNKVLK
WIRYPIPNKRDLIGRLYNASIFSKFDMKSGFWQIQLHEKDRYKTTFTVPFGHYEWNVMPFGLKNAPSEFQ
NIMNDIFNPYTNFSLVYIDDVLIFSNSLEQHFKHLETFQKIVRDNGLVISAPKIKLFQTKIRFLGFEIYQ
GTIKPIQRSIEFGSKFPDEIKDKTQLQRFLGSLNYVSDFYPNLRTTIKPLFARLRKTPKPWTQEHTNIVK
LVKEQVKSLPCLGILNPDAFPIIETNASNIGYGGILKQDFQNKISIIRFHSGIWSGPQENYSTIKKEILA
IVLCIQKFQEDVFNKKFLLRVDCKSAKEILQKNVQNIVSKQIFARWQAILSVFYFEIEFIKGDSNSLPDF
LLREFLQGK*

>LjapCV_sc1 [endogenous-virus-name=Lotus japonicus C virus] [strain=sequence cluster 1] [host=Lotus japonicus] lcl|Sequence 1 ORF:269..5599 Frame +2
MARLIKTLSEISLGKNKQIMIPSTSNSGSSNQDQELSRVAQQELEIASIERALQNWSIPIVKKKEIYKQH
TLFNRADDSIFTIECCQHSSDHTSTIKLLNEDVLDQHIKNGFNFIHVGLIQVAAKPNFRLGINSPIIVML
RDMRLLKPQDSLIAVLESNLHDGPVFFNCYPNYAMNLQNSWTKNAIQLDLLANNDIFEEESDPFSIIYRV
YYKVSKINYNFKALRSSPKQETIMLEANLKRSSVQVPKKLTHEEVMSKVPEEWVFKNSLPQPKIHTTQVR
ELFQEGANLTLRMNRSNSFSIRSPQQLYRVDLPRSSVSSKLKGLDTTSSPNIATPIYQDEESSNYSPTPS
QINMLSRVKPSFEIDKDFIKKDFMAEYNKDKRLWYFKNYSKQETETLRAFYYEEMEVSETNIYFFDWFEN
HCIKNNLNYPFWKNVNPITKINTTWKTPDNNTITSEYPPQTGVKIVIKDGHEIEASPYKAEANKVHQQLN
FANTMLTVMSKQLERIEVQKPSITTKEASSSFTLGNPLQTPIFKIPQYTKEEFNSFNLSGSVEKLKEKLN
KLSINHLDKDLKINKIRKFGPDNNTRAYYPRPSYSDMRFEERKEFIQNTFSGTSLDEWNIDGFSEQNILD
ITHQMIMAATAYKVHNNTDRNAALMITHGFTGQLRGWWDNIMTPEDKSTILEKKKENGEEDAVATLIYTI
ILHFIGDPSIFRERASSQLANLYCPTMSDYRWYKDTFFSKVTLREDGNSAFWKERFIAGLPRLMQSKVLD
NLSLFNQGNPVNFGSLSFGQLHNTIVHTGIQVCTDFKLQNKMQKDMQISRKEVGSFCEQYGVEPLQAPSS
KARRINRSKTKPSQGYKKRKPFQKKPYEQSPTTQKPINKKAVNPNKKKNVCWKCGKPGHYANKCKTQQKI
NELDLDQKLKDSLISVLINSEDPHYSSENEYEGDEDQDVNLVEYSSDSHSSSEEERECVKDSSGFCDCAG
CLGQNVNMLTQDQTMSLISIIDKMEDSPLRDEFLQQLNLLVKKEETLKKEISPPINSMNEIFNRFRPKPT
ITLSDLQEEVKILKEEVNQLKQNDLSLEFRLMEIAGIKIIESQETLASTSGLKQIHNEEEEEPSESYLNL
LNLVITHKWHSEITLVINNDFRINIIALIDSGADINCIQEGLVPTQFYEKTKEGVNSANGSKMNIQYKLS
NAKICKSQVCFRSSFVLVKNMTEKIILGTPFICLLYPIDKIDEKGIVTTVLGKTITFPFIKPPQVKELNL
LKEISTSKINIISRKKNHINSLQKEIKYYKLEEQLKRSNIQKIIKDFQDRIEKDLCDLNPMAFHHRKIHT
ITLPYIDGFNEKDIPTKARPIQMNEQYLKYCREEIGEYLNKGLIRHSKSPWSCTGFYVMNASELERGAPR
LVINYKPLNKVLKWIRYPLPNKTDLIKRLHKATIFSKFDMKSGYYQISVKEEDRYKTAFVVPFGHYEWNV
MPQGLKNAPSEYQNIMNDIFYPYMDFTIVYLDDVLVFSKGIDQHVQHLEKFIEIIKKNGLVVSAKKMKIF
ETKTRFLGYEIHQGQITPIQRSLEFAKNFPNELKEKNQLQRFLGCVNYVADFIPNIRIICAPLFKRLRKN
SPPWSEEMSHSVREVKRLVQNLPCLGIPDPDASLIIETDASELGYGGILKQVKPQSSKEQIVRYHSGIWH
PAQQKYSTVKKEVLSIVLCVQKFQDDVFNKKNLIKTDCKAAPSVLQKDVQNLVSKHIFARWQSLLSCFDF
EITHIKGDSNSLPDFLTREFLQGKHE*

>VvinBV_compAsc1 [endogenous-virus-name=Vitis vinifera B virus] [host=Vitis vinifera cv. Pinot Noir] lcl|Sequence 1 ORF:213..4307 Frame +3
MSSIFRTMSRRSSDSQDTVVNSEEINYPKIQNDLDDWKLPKVSNQEIYKKGTFKFFTDYTIKTSEMTVSL
EQDDQVIRLLDNRSVEKHKKDGYNFIHFGMIQVAAKPLTRLGLNTAIVMCLRDNRHLEYRDSIIGAVQAG
LNDGPVYFQCYPNFTVRLRDADILDSVVLHIKTHGFKIKPGNSPVSIITRFAYKSMNTSVGSGALCTSPK
GETTYFHSDMLDKSDFIIPKKILWKDVDFPENWHFANAVPAIAQRSESIEQIVQYPDGGGELVFSKSFRH
SSSPRVSVYEPSRASSSSIPVRTTREEEGSSSGNPKNVKLTGVRSYTNVARPFYTEENESTQESQQDESP
VMSPTYSQMINTISLSDEDFEINKDLLRKDFYSEVNKQRNDWFFSTVPKVIRTIYQEEFYAYLRQEKKNI
KFWIWFELFKQEEYPDYPCKHINNTSTKAKIWKTSDNIVIESIHPPEAKIEKNINGTIVTASPFKTKPED
KGTASASDIRRIMEQINYTNMFLITLGNQVNRVEEIIETQDHLKKPFVKNDNKPLFKPFELSKKFQENPQ
IDQAFIDRISQKVKDNLVIPETPQFTSPSHRRILLVKRNISPKAKDNGLIRLTREPSIQNPFKDHDDKQE
KRIILNALTIKDLQEEIGQYKKDIENLRQPTSSEIPIPQDYINRVGFYHSSPKKEDFEEVLESSQDNSDK
INAYLNTISKVIFQRWEVSLTIVIKNKFILDIIALIDSGAALNCLQEGLVPTQFYEKTRQALFGANGKKL
IIKYKLSNAHICNQGICIKQTFILVKDLKEKVLLGVPFLSSIFPMWVDDQGIRTKLLDKEILFEFANPPG
ERSINTIKDQVIKAKQNHINLLKQEIALVRIEDQLKVKKTQDAIENLKNKIIKEVCSNIPNAFWHRKQHE
VELPYEPDFSEKNIPTKARPIQMNKDLLSYCEKEIQDLMDKKLIRKSKSPWSCSAFYVQKQAELERGTPR
LVINYKPLNDVLRWIRYPIPNKKDLLQRLGKSKVFSKFDMKSGFWQIQIAEKDRYKTAFVVPFGHYEWNV
MPFGLKNAPSEFQNIMNEIFNQFSDFIIVYIDDVLIYSDSVEQHWKHLNRFIETVKSNGLSLSATKINLF
QTKVRFLGHHIHQGTFTPIQRSIEFADKFPDEIKDKKQLQRFLGSLNYVSDFIQDLSQLCAPLRQRLKKN
PVPWNEDHTKIVKIVKSRVKTLPCLALADHKAFKIVETDASDIGFGGILKQRSNNQELLVRFTSGTWNHA
QLNYSTIKKEILSIVLCISKFQDDLLNQEFLLRVDCKSAKSVLQKDVKNIASKHIFARWQAILSNFDFQI
EYIKGENNSIPDFLTREFLQDSQDHGSQNRKAIL*

>BrapV endogenous-virus 7881 bp lcl|Sequence 1 ORF:218..4633 Frame +2
MESYFRSSSYKSQSASSSSRSEKKAIKDSKKIVTSQETTIDDFQGSIDNWKIPRVHKDQIYQISKMNFLR
TNFSIKTEERDIQLTKPFETIHLFSENALQRHREKNFKYIHIGWIQVGIKPLSKEGLNTSILAILRDTRF
KVFEDSLLSSVESSLCTGPISFDCYPNFTVSLNDKNILKSLVLQVKTHNYEMIEGSIPIALIFRVHYKAM
TSAFSSKVKLSSKKGETLLLQTDLSRSNSVIPRSIQWKDINLPDEWVLEGAVQPKIPAPQESIEPNTRLK
HIEQFRDGKVKLSFIRNNQDRIDEYLCGSSSNMCESSSNPETIDLGRVSQLGHDFPREEKSMKFRPRFST
SDIPNSVLRNVNFQSQIPKPVYSAENDLSQNEFITKSEPTSPTFSAITDNMLNELNVLEKEFSIDKEFLR
DDFYSKNNSQKRLWFFKNFLKERNNIQNEFYDYLQTHKVQILFFNWFEDYASKNSINFPFSKTVNPITNR
NKTPEWETLANGKIIRSNHPPPQGIKLDWLGTPIEAIPFKRPQEDDKANIKNIIVQNNFSNTNLGTISKQ
LDRIEKSIQNQNPIPMESPSEKKNKSPMFKPFQISNSSVKTYQDTNLEFIRALQSQLSKAEIGDSSMPHI
SDIPDTPTSKIQINTLANDSDISECSDKNSVSKINRLDRQNHKDRQLISAPDLGQIQPIEQSRFNSSSVY
DWNIDGISEYNILSFLQKMTMAANAYRTQIGNEDKTVAELLIAGFSGQLKGWWDNYLTNQQRTEILDSIK
TDEDNVPILDNLGNPQQDAVATLVIAITLHFIGDPSVLRDKNAELLSNLKCKKLSDFQWYKNTFLTRVLL
RQDSNQPFWKEKFLAGLPTLLGDKVRNKIRDSMGTQIIDYDDFTYGELVSIVQQEGLRICQDLKLQKHLK
WELKRTKVELGSFCKQFEIDPNQGSKSCVGDCNKNYYSKNKPRKHSRNYKSFRSRENSWKKPQNKFPSKE
TPAKKPFYKDLTCFKCNKKGHTSKFCRFNRKIQELNLGEEISNKIDNLLLNDSSSSYDSDSSVASEKALQ
VDELNSSSSSSESNEKNIYVLTKDQELQLEILNSISDPSLKQKFLEKIISSLNEKDDKNIDNSPKSHGPS
SSKSSYDLTTILNKRKKDTSKTTIQDLRIEIKEVKNDLKILKEKQRQDSEYFHSIISSIKDPHDSSSEEQ
GNDCLNNQDENLKEQIQSLDMAPNDFLFVLREITSRKYKIRVTIVFSENYKIDTIALFDTGADLNCIKSG
LVPKCFHLETKEKLSAANNSKLRITSKAEASILKENILIKTAFVLTDDIYQNVILGTPFINLITPYKVMD
DKISFKNQNIKLSFKFLETPKKRSLNLIKACSIQENFLNSLIHSKTFHLEHLKSEVLLQKTLETLNSKDI
KEKISNLNKLFEKEICSDLPTAFWNRKQHIVDLPYDENFLEKEIPTKARPIQMNSELEKHCRKKISDLLE
K*

>CclemV_scCc1 endogenous-virus 7597 bp lcl|Sequence 1 ORF:205..5799 Frame +1
MDPPICRTSSFSSSSSGKTSESKHVVSSEEFIIENFDKAIDCWELPKISKEKIYKTKMLDLLKHDYIIKT
EERDITLSEPFETIYLFSEKSLKKLKEKNFKYIHIGLIQVGIKPLTKEGLDTSILAVLRDGRFISFDDSL
LSSIESSLCKGPISFDCYPNITISLKDKNILKSMILQIKTHNYHMIKGSIPVALIFKISYKAMISAFSTQ
HKYQSKRDETLLLQTDLSKANTVIPKPIQWKDVNLPEEWILEGAAPPAIPKQLEPNTELQNVTQYSDGKV
KLSFRRSNSSRFSDKASCSSIPSLERKFTKIPSVINLPFQPIKSQPRFSTSDIPSTSIRSVDYTTSVPHP
IYTSNQHVQSQEEKEPSPPTSPTFSAVTENVINVIEKEFELDKTSLHNDFYSDLNKEKRLWFFKHFLNQR
KEIQQTYYEFVNFHKVHILFFDWFEIYSSDNNISYPFKESNPITIRKKVPEWKLLDSDRTIESEHPPLRS
VTVDHGEPPVQIRASPYKIPKPNDSEANLSSIIQQNNFCNTNLNTIGKQLTRIENQIQKSTITVPSISPI
PTKSDSDKKLKEPIFKPFQVSKTSQKLVQESKSDFAKAIREQLDRIEAASSSSSKVQIAPDTPQSSKIGV
LEHDQMSIASSDIEAFKEEPTPKANKIHWELALPTVKTPPDLAIDNRPSALNQSRYNASSVYEWNIDGMS
EYNILGLLQQMTMAANAYKTQAGTSDRAISEILIAGFTGQLKGWWDHLLTNQQQLDILNSIQVDENGVPI
FDEFNNPIQDAVATLILTISLHFIGDPSHLRDKNAELLHNLRCRKLSEFQSYKTSFFTRLFLRDDANHIT
WKEKFLAGLPTLLGEKVRNSIKALYDNRIPYDELTYGELVSFVNKEGLKICQDLKLQKRLKWELKKSKQE
LGSFCKQFNYDPFKTSNSKDCNGECSTKPRRKHYKSKNFRKPFRNFRELPYKKPSRPYKKPKFSKRKEFR
AKPKTPFNYKEAICHKCGMKGHTANYCRMNKKLHELDLDEEILSKLAPLLVESSDSESSMSGDSDPYQVD
ELFDSDDSVSSSSESESDSYLKKINVLTKDQETFLELVKHISDPNLQKEYLDKLLKTLDFNKAETSKVPI
VKKNSYDLTQILDKKKTKKTVPNIQDLQKEIKEIKCEIRDLKEKQKSDSDTIQLLLQKQLQDNSDNESNP
DDGDDIKVENIESVPNDFLFVLKQITTRKYLIKVTLIFSDDFAMDAIALFDTGADLNCIREDIVPKRFHE
KTKERLSAANNSKLNVSSKVEASIHNNGFDFKTSFVLTNDIHHAIILGTPFINLITPYTVNYDSISFKAK
NKKLVFPFIEKPKTRNLNIVKACSVYQNKINNILKSKQYDLMCLQKDLNLQRIESQLQNDFIKRKISDFK
TLIEKEICADLPSAFWNRKQHMVDLPYETSFNERQIPTKARPIQMNMELEQHCKNEIKDLESKGLIVKSR
SPWSCAAFYVNKNSEIERGTPRLVINYKPLNNALKWIRYPIPNKKDLLQKLCSALIFSKFDMKSGFWQIQ
IHPNDRYKTAFTVPFGQYEWTVMPFGLKNAPSEFQRIMNDIYNPYSDFCIVYIDDVLIFSRTIDQHFKHL
KTFYFATKKAGLAISSSKISLFQTKVRFLGHHISKGTITPIERSLLFADKFPDKILDKTQLQRFLGSLNY
VLDFCPNINRMSKPLHDRLKKNHVAWTEEHTKVVKLIKKSVKNIPCLYLANPALPKIVETDASDIGYGGI
LKQKENDKEQIVQYVSAHWNDCQKNYSTIKKEILSIVLCITKFQSDLLNQKFLLRIDCKAAKHVLEKDVQ
NIASKQIFARWQAILSVFYFDIEYIKGDKNSIPDFLTREFLQNR*

>EgranV_sc1 endogenous-virus 7803 bp lcl|Sequence 1 ORF:186..5729 Frame +3
MSLHRRSTSSSSSLSQMDSDPSPIHREEVRIEDFNKSIENWEIPKIQLKEIYKQSKLKFFKKSDYVITTE
ERDVPLSNSYEKIHLLNKESIQKHKQKYNYIHIGLVQVGVKPLTKEGLNTSILLVLRDSRLLNYDESILG
TVETSLCKGPIHFDCYPNFSVSLKDKNILRALTLQIKTHNYKVADGSIPLALVYRIHYKAMSSAFGENAF
KHSPRGETLLLQTDISRANTTIPRSINWNQVTLPEQWELENQIPQQVVQNTDPTNVIQHPEGRVTIRFPR
RSFDSRSSPSFHNSYTRSIDLNPNLPPIITIPPSTHRNTPPPSIHRDTPTHDTTPLPPSTSRINQETPPE
PEISGLDNRSGISRPVYQQNQPEPVLESTDSPHHSPTYSQMIDAELNVLEKHFEPNKTFLNKEFNSEDNK
QIREWFFKTFADKAKDIKQKYYDYIYEYEVHIFFFDWLEEQFLEPKEILVLDHHYKWKLDNGETIESNHP
PLRRIKIQHGESEVTATPFRLPDQGDSLYTHKVIEQNNYTNQHLATIGKQLNRIESTIQNPTQLITPQVD
TFKKPIFKAFEFPKNLSPEFAKAIEQKKKLLGKSKLEPTPIIDTPKFQNLIIKDTPDQPTISTLTKQSGD
SDNESVAEINRLNWRQPQKLYYSRATPPDIAQEESSQKIHNKYSPDAIYEWNIDGVAESNIMNILNNMVM
LANAYKTQQDVSDHAVANLLVAGFTGQLKGWWDNYLTDEQRIQILTAYKIDDFGQRMDDDQGHLIQDAVN
TLIYSISQHFVGDPSHIRDRNQDLLSNMRCKSLGRFREYKELFLQRVLIRPDCNQPFWKEKFLAGLPQII
GDQVRDKIREEYNGQIPYDLLSYGEIISYVYRQGTQMCNTIKLQRQLKEEQSLTNRSLGDFCAQYDPSYN
EKTKPKCKGTCPSEKETKKHHNKSQPRRNKQRHQNNQNRPHNDRKIFKDIKCYSCGKKGHISKYCRINKK
LNELSLDDNTLNQLNNIFIENGDTSSDELLEEEGLQINEIDSSSDSDYEDASPEKPIPEINMLTKEEEFL
LSTADKITDPEAKKEYLDRLHSSLNITSKPNTSYNLKDILNRNKKPQSRPVNINDLQNEIKQQKLEIQAL
KATQLDMKKEISDIKSLVIKGKTKLEDQNEITNTSDTPDPAFLMLLTEITSRKWIINIMIKINNEFIIET
TALFDTGADLNCIKEGLVPTIYFDKTSESLKSASGDKLNIQYKLPEALIIKDQMSYKTSFLLVKNMRQQV
ILGTPFIQLIQPFTVTNEGIETHALNRKITFNFITKPQKRSLNILQEHSISEINCLIKDKENQLEFLKED
LEFKRIEENLIKPNIIEKIASLQKHIEKTICSTLPNAFWERKKHIVDLPYEHDFSENKIPTKARPTQMNQ
EVLKFCQAEIQDLLNKKLIRKSQSPWSCSAFYVNKNAELERGVPRLVINYKPLNTALRWIRYPIPNKKDL
LNRLCRSKIFSKFDMKSGFWQIQISEKDKYKTAFTVPFGQYEWNVMPFGLKNAPSEFQRIMNEIFNPYSE
YIIVYIDDVLVFSSNIEQHFKHLSTFIKIIIQNGLVVSPTKIALFKTKIRFLGHYIHLSTITPIERSISF
TDKFPDEIKDKTQLQRFLGSLNYILDFFPNINILCKPLHQRLRKDPPPWTSVHTDIVKQIKMHVKDIPCL
HLADPSTFKIVETDASELGYGGILKQVNNNKEQVVQFISKHWNSTQQNYSTIKKEILAIVLSISKFQGDL
LNQKFLLRIDCKSAKDILQKDVLNIASKQIFARWQAILSVFDFDIEFINGSSNSLPDFLTREFLQGIPIC
QDPKKTKIKAKAKPLPNPPIHHQSQKA*

>FvesV_sc1 endogenous-virus 7725 bp lcl|Sequence 1 ORF:426..6023 Frame +3
MSRLFRSNSVTSSSSRSSLNRIPDIVNEEQIEYQSNDNIDMNDWNIPRVPSHEIYKKKWSLASFKSEHHI
KSVEQVYALSKQHETCQLFSPESIKKHKKDGHNFLHIGLVQIGVKPLTRKGLNASILLCLRDARFTDFND
STLGLIESSLFNGPVHFNCYPDFTISLSDPHILKALTLNIKTSGYHVLEGTQPLALIYRIHYKVTGTNMN
FQAISKSPKNHTLLIQSSQENANISIPHTIRWSDVHLPSEWSLTSENQPSNAQHSLSDLDCIQQFNDGTV
RINFQNSRISQNPRIQEVGNSSRHSFATARHSFAGSTTAETMSRRDSDLDKEIKNIRIRELEEELQKLKI
KNIKTTSQVSYPNYTENESQNISTTDEEQTSPTASDFLVTPPLNPQLSTLTQPFVINYSRLDKHLESNEN
ILRRNLYRMKFPFMDQRKQLFHDWQAFMLETRSEIFFLDFIDQLNNQKIQTLTKARWKTSTSSVLSSHPP
VETIIIDHLNSPITASPFKIAIEDPDTKKINPDTKKIIEQNNYTNQSLVTIGAQLDKIETKVDNISSKVN
ILPQPKPETPLVHFSELNKPTLNPTSSIQKIERMLEKLKTETPEPSRIAVIHTQQTSSSTSSDSDSSNTS
QIKEINQILQTLNIEPLNLDRIVHPKKRPFKTWTERPLPLDIQPTNHLNNQFSVSSDKTYEWNIDNLSEQ
EILNKLHHMSMAANSYVTNHNFTQPEIIDILSTGFTGMLHSWWEKHLTPDSRSSIKHAIKRDEDGTPIFD
ERTGMGISDAVNTLFYTIIQHFIGTPSHITSRIHDQLSNLRCPTLSDFKWYKDVFISRVMLRDDSNQPFW
KEKFINGLPKLFAHKIRQVLSNETGHINYDSLTYGNIITVIQKEGLKMCIDMKLNAQMKSDKKTAKYELG
NFCEQYGLPPLPPSRRKKASNKFIPYHSKRKFTPYKNNFEPNKFYSKNKFRKNWSKKPNHQLKSKPFDKS
KTKCFKCNKTGHFANNCPVKSTINQLKISQEEKEKLIQTLELRNTDSENEMSEDDITLMESSSSESNEHS
SPDITFGCKDACNCKTINVLSKQEEQEELLIDLIGKIDNPELKAEYLKKLKKLITQENIVNPPSQKISLT
TTFDKFSTSKKEITIQDLQHEVKTIKSQIHALQQTHLELTNDNKEIKQEINLLKINNQFLKLQDPLENPF
PNPFPENNEAENSENNTISTIRQIQLKKWYTTVQLKIKDFQITITALIDSGADLNCIQEGLIPSKYFEKT
KESLRSANGTKMDIKYEIPKAHICQNNVCFKTSFVLVKNLTDKVILGLPFITLIYPFKTEYDGIITYPFD
EPVKFTFLSNPEIHTLKAFQENNISKTLGCIQAKIKQITFLQEEINFKRIENQLQNSFLQQKIKTFEEKI
IKEICSDIPTAFWHRKKHIVSLPYIKEFNEKNIPTKARPIQMSHEIMDFCKNEINDLLNKDIIRPSKSPW
SCPAFYVQKNAELERGTPRLVINYKPLNTVLEWIRYPIPNKRDLINRLNKSVIFSKFDMKSGFWQIQISE
ADKYKTAFVTPFGHYEWNVMPFGLKNAPSEFQNIMNDIFNPYSHFSIVYIDDVLIFSQSIDQHWKHLHQF
FSIIKNNGLVISASKIKLFQTNIRFLGFNIHQLQIKPIDRAIQFADKFPDVILDKNQLQRFLGSLNYVAD
FYKNLRKHCKPLFDRLQKNPSPWTSVHTSLVKEIKSHVKTLPCLGIPLPDSYKIVETDASEIGYGGILKQ
QLSPNHPEQIVRFHSGIWNPAQSNYSTIKKEILSIVLCISKFQDDLLNQKFLVRVDCKSAKDVLEKDVQN
IASKQIFARWQAILSIFDFEIAFIKGSDNHIPDFLTREFLQGATT*
 

>GraimV endogenous-virus 7646 bp lcl|Sequence 1 ORF:243..5723 Frame +3
MFPFLRRTNSSASFVSNQSQESDQTSNNTVNEQEEHYENIPQRFDNWTLPRVPTNQVYKKTTFENLNAFC
SYVIKTKERSLPIQKEYETIQLLDKVVINKLKEQRYKYIHFGLVQVGVKPLSVEATKNTSILVVLRDQRH
IMFNDSLLGTIETSLCTGPIHFNCYPNFMVSLTDKNILQSLTLQIHTHNYKMLPGTEVLTLVYRLHFKAM
YSVVNTKALLQSPKGETLLIETDTTRSHTTIPRTIQWHEINLPDKWKLEGATDPVAPTPIRNTSLSEISQ
HQDGTVELKFNRPQRMPPRYSFEIGSTSTAFRRLNIEEESNPETQTVDFRTARASVSSIPTTFRTNLQGI
DNSSNIAQPIYARQEESPQNSPNMSPTYSSMTNNARQGENSEIFVLEKTFEINKEWCRKHFYSNKNKQKR
EDYFKNYNDKKESILQEYYGFMNTHKVHIKFFEWFEEYYLESVNTIRHNTRWQTNKGEVESRHPPLMEVQ
YLHKNTGIKANPLRMRAPDAGEQISSKDIKMIVEQNNYTNINLHTIGKQLDYIENLVESQPIRKEPVKEI
TEKSSKEPIFTPYEIPKPFQKSQNDFLTEIQNRLNALESYKSELIAPDTPIQAQYSVNTLHQSSQSDSDQ
SDEQQINKMAWKEPKRLYYPKITAPDLNIEEKPVFQNKYNANTIYEWNIDGMSEYNILSLLQQMTMVSNV
YKTQNQNGLISDHAIANLLVAGFTGQLKGWWDHALTKTQQEEILKAIKKDDQDRIILDEQGREIQDAVAT
LIFSISKHFIGDPSHLKDRNSELLSNLKCKKLTDFKWYKDVFMTRVMQRSDNQQPFWKEKFLAGLPTLLG
EKVRNQIRENYKGIIPYEKLTYGELISFTQKEGLKICQDLKLQKQLKKERYQCRKELGSFCHQFDIRNEP
SSSKTCCPVKPKNRKKNISEYYKKPKYRKYRKGKKQQKTENKIDKTIKCYRCGKPGHISKYCKIKRKINN
LNLDEEIEQKLNEILLETTSSENDTSTETDELQIDELHTTSQSSGDENEPSINMLTKDQEFMIEVIDKIQ
DLELKREYLLKLKSSLKDKPEKEKEIISSQSQMYNIQDIIFNKYEKIKPRQITNSELQLEIKQIKLELSQ
LKIEQQEMKEQMRTLKHETSEKSSSETEPEPEENTQEYMMVLTEVSIQRYLIKINIVINNEFQLETIALF
DTGADQNCIREGIIPTKYYNKTSESLKAANGKKLKITYKIPNAEISNKGIKYQTCFLMVKDITQDVILGT
PFISLLKPYKVTNNSISTKVLNTKVEFPFVEKPKIRNLNLLKSLSIHNGQINNLINYKQKQISFLKEEIC
FKKLTEQLRKREIQKRIDQIKKEIESTICSDIPNAFWNRKKHEVTLPYENDFDERQIPTKARPIQMNKEM
EEFCRKEIQDLLNKNLIRKSSSPWSCSAFYVIKNAELERGTPRLVINYKPLNQALKWIRYPIPNKKDLLQ
KLCNANIFSKFDMKSGFWQIQIKEEERYKTTFTVPFGQYEWNVMPFGLKNAPSEFQRIMNDIFYQYSQFT
IVYIDDVLVFSENLEKHFKHISIFIKVIRNNGLVVSKSKISLFQTKVRFLGHYITQGTITPIERSIEFAS
KFPDQILDKVQLQRFLGSLNYVIDFYPGLSKLCKPLYDRLKKNPQPWTNNHTNIITQIKKQITKLPCLYL
ADPNAPKIVETDASEIGYGGILKQVKGGKEQIVQFTSRHWNPTQQNYSTIKKEILSIVLCITKFQSDLLN
QKFLLRIDCKSAKEVLQKDVQNIASKQIFARWQAILSIFDFDIEYIKGETNSLPDFLTREFLQKCPPNSE
TKEKGK*

>LjapAV endogenous-virus 8013 bp lcl|Sequence 1 ORF:416..6019 Frame +2
MAMILTGEEDLSFMMLRSFSSKLSFRSSQPSSSSIDHPHQSNQLSKSVFKEEIHFEDINQDLDNWEIPKI
SHAEIYKPNGSFFKRSDFIIKTVEQTYKLRSDDEEIHLLSEKSIKEHISKNFNYLHIGSVQVGLKPLTRK
SLDIAVLLCLRDVRHNQFHDSLLGTVETSLSNGPIFFNCFPDLTVSLEDKNILDVLFLNIKLHGLDMKED
SIPISLIYRVQYKVMNSIKSYFLRTNCEKSGETTLFLTDYDKANVIVPKTIQWSDITLPEKWSLEKATPA
QPVETPEFREIIQHQSGQVDLIFDRRNSFSIPRSIRTSSNDFQSAMSRRSFSMTRRNQPESSARPSLSHD
GSTIHLAGYVNTTPVKTTYDKGDEDHQSTLSPTYSSLETPGETSDFIGAITTEFVIDKGSIKADFYSDRW
TQQRKWFFAKYQGEKRKKIQEKFYGFLEKTQQNIFFFEWFQDYANKNWKSYPFQIDMVKWQHKDGKETLS
NLPPKTPFLLKGAQSTPVLASPFKTRKEEGDVTGKDIKDLMEQSNYTNKYLQILGESQVQDSSSRKGKEK
VKIEPSSSNLDIPKGCQLEKPLFKPFQISSRSRHSAQTLRAKKESDNELLQKVVEQLQLLKQVIPETPEP
PETPEPTPEAVSNPTITAPPPPKTRTSTRNTSTSLNNIEDGKVESDSDIQSMKSDVQSIKSIPVNTVIHN
SKNQWRKETKLYYPRATAPDLLLEESSNFKSFSANNVYEWNIDGENEYGITKILQNMTMVATAYVTANNC
PESLIVEVLVAGFCGQLKGWWDNYLTQDEKDQILTAVKTDEEGNPIMEDGKFISDAVNSLIFTIAQHFVG
DPSLIKDRSGDLLSNLKCKSLGDFRWYKDTFLTRVYTREDSQQAFWKEKFLAGLPKSFGDKVREKLRSQN
PGGEIPYHTLSYGQLIAIIQRVALKICQDDKIQQQLTKEKSQNRRDLGTFCEQFGIQGCPKKPKPRKQDP
PPKQQWRKRSSRNDHRKPKPRSKPQSSQIPKNPPETRPSQGKDVTCYNCGKPGHISRYCRLKRRISELHL
EPEIEDKINNLLIQTSDEEESNPSDSEVSEDLNQIQNDDSQSSSSVNTLSINTLTNEQDLLFRAINSIPD
PEEKKIYLERLRSTLEDRPPKSPITTNKFNLRDTFKRLEKSTVKPVTIQDLQSEVNSLKTEVKSLKQIQN
SQQLILEKLTRNYEEDDSSVPDSNPAPNNNCEDFLENINQVTIQKFFIHVKILIGDFILEIPALFDTGAD
SSCISEGLIPTRYFEKTTEKLSAAEGSRLKIKYKIPSAIIKNGSLEIETPFLLVRNLSQKIIIGTPFIKK
LFPYNTDENGITVQHLGQPILFKFSEPPIDKTLNVISYKEKQINFLKEEISYRTIEDQLQQPSVKSRIEN
ILENIQSSICSDLPNAFWERKSHMVELPYEKDFSDKQIPTKARPIQMNEELLHFCQKEINDLLEKKLIRR
SKSPWSCAAFYVNKQAEIERGTPRLVINYKPLNQALCWIRYPIPNKKDLLARLHDAKVFSKFDMKSGFWQ
IQLQEKDRYKTAFTVPFGQYEWNVMPFGLKNAPSEFQRIMNEIFNPYSKFTIVYIDDVLIFSQTLDQHFK
HLNTFISVIKRNGLAVSKTKVSLFQTKIRFLGHNIHQGTIIPINRAIEFTDKFPDQIIDKTQLQRFLGCL
NYVADFCPQLSTIIKPLHDRLKKDPPPWSDIHTNVVKQIKLRVKNLPCLYLPNPQAFKIIETDASDIGFG
GILKQKVFDKEQIIAFTSKHWNPAQQNYSTVKKEVLAIVLSISKFQSDLINQKFLVRVDCKSAKEILQKD
VKNLASKHIFARWQAILSVFDFDIEYIKGSNNSLPDFLTREYLQGRS*

>MescV endogenous-virus 7676 bp lcl|Sequence 1 ORF:134..5608 Frame +2
MERLFESLSGRSRGSSSSKSLSKKSTKNKEILLAQDLDTSLNNWELPPISSDLIYKSNFMYKSDYVIKTV
EQATPVHGDMQSLSLLSEELIKRHQEKYSFLHIGMIQVAVKPATRLGLNTTAMLCVRDKRHFKFNDSLLG
VVESSLCDGPIFFQCYPNLTLSLTDPYILQTLILDIKTMGYDMLPGSENLILIYRIHYKAMNTVVPNLRE
KATKLISPKGTTTLFVTNMSKGNLIIPKSIQWDQVNLPESWILEEAAPPKKEESTTVQSIVQNNKGSVAI
SFARSRSFGGRRSYSNASLLSESLPPRSSVSTPIQRSNSVIGVQRTEEQIANPVYEKPLSPTPSDMGYDT
ESVISRSFKIMILEKEETPFEKWFSMEISNKEQKLWRSKYKVYKNQKQGSKDFPEFIHHCFTLLKKPYPN
FEDISFLTTLETNYKTFINPHGKILKDMHPPLTDLIYQPTENSKVECIPFSHDNSENPAARQQNFTNLSL
HTIGQQLSRVENQVSKIAAQPSGVDILPQKEKAESSGTKMEERVLFKPMDSKSINIKLDKKEEMLEELTK
RLAKLGLKEDTKKKSIVPLTMESENETEREERQNEEELTQLESMLRETEPAEVNRIKYPKAQATMDLKPY
YPRPSPINLQYEDTSYNPVQVDGSSIMEWNIDGLSDYQIKNVLQYMTMHATACRAKGNDDPAAARALIAG
FSGQLKGWWDFSVSNEGKAQIFNMVKQEGAQQVPDVVNTLLYTIGLHFIGSVSMFTDRAQEQLINLRCPD
LSHFKWYKDTFFSLVFTREDSQNNVWKEKFLAGLPTLFAERVRDQIRSKHNGNIPYHQYTYGELASEVVT
AGIILCNELKIHKQMQKERFYGKQILGNFCEQYGLPPIKFPSTKFKGGRKEDNHRHRHRRTKRFYKDKRP
YKEKHKRFQKPEKSHKPKEKRKPNQGKAEKTIVCYRCGKVGHYANKCRVKQQIQALTIEEDLKEALAKIL
LNETDSEQEVMALNALDYTTEEEESSTEEDEEQKEECEGNCDYYKSLCAMNGLLVLTREDNLILDLIDNI
ENPEKKREKLETYINLYKDKDSSTSTYNPIEKKIDSKQSPYDLKEILERVKNSKRQKEPTVAELRSELNS
VKTEIKELKERINILELLNEQQQLAIEEPEEEQSKAEVKDVNNLHYINMTDRVITHKWHTKITIVVHKEY
LFETNALIDSGADLNCINEGLVPSKYFSKTVEELHTADGSKMTVRYKLKDTAICNQGICFEIPFLMVKGL
SHPVILGNPFLHMLYPIQQVTKEGISTKINGKVITFHFTSQPKVREIDVLKSTVESKTKFINSLKQEVVH
KSIEERLKEPKVQQRIKIIQEEMLNSICAESPDAFWTRKKHVVNLPYEPEFTEKAIPTKARPIAMGPRHL
EICKKEIAELEAKGLIRKSSSPWSCPAFYVENAAELERGVPRLVINYKPLNKALRWVRYPLPNKRDLLNR
LYEATIFSKFDMKSGYWQIQIAEEDKYKTAFTVPFGHYEWNVMPFGLKNAPSEFQKIMNEIFNAYSAFSI
VYIDDVLIFSKTIDQHFKHLKMFEKIVKLNGLVVSAKKIKIFQTEIRFLGHNIAKGTIIPINRAIEFASK
FPDEIKEKTQLQRFLGSLNYVADFYKNLAQDAKPLFQRLKKNPPEWTNECTLAVKRIKDRVKTLPCLAIP
HPESFKIVETDASDKGYGGILKQRINNKETLVRFTSGIWVGPRVNYSTVKKEILSIVLCVQKFESDLLNQ
KFLIRIDCKSAKEILLKDVKNIASKQIFARWQAILSVFDFDIEFIKGETNSLPDFLTREFLTGNEFKDSG
QKTA*

>MgutV_sc1 7228 bp lcl|Sequence 1 ORF:274..5712 Frame +1
MERISRSLSNRYKANHTNSSSNKEIIISENIDNTLQNWKLPSSSSVYKQKGTFEFTSDYIIKTVEEAMPL
TEGYNAFQLLSRQLIEQHKRKYKFLHIGMIQVGLKPATRLGLNTSAVICVRDKRHNKFHDSLLGIVESSL
CDGPIYFSCFPNFTLSLTDPTLMHALCLDIKSEGFNMMQGAENIILIYRIQYKVMNTVIPRIKEIPTQHR
GYTTLFITNLAKSNLKVPKTITWDQVNLPEKWVLEKASEPVKQENRELEEIIEYPDGDVEIKFSNQRIAH
LNLGRKSTSSVPISQFERDNLLGTKFTTDGVNQPEYKVELPPSTSGTSRNIPKRQSPTPSDMGYDDRSVY
GINTLTVEEKIELEFPIQGLAKELFYSPENEIKRKWFYSKKNFEGQKKWFMLYKKFIKKTEEIIDFFEFL
KIFYQSEKRHFPQFDDPRCISTIESTFQNYITKRGTLVKSIHPPAANLTVQIDKDEVIATPYRKGSTIEA
VVEQNNFTNLSLQSIGNQLNRIEQKVAYTESTSKPLQIEQKVLFKPMSTEKTEFKLQTQESSEMVDEIVK
RLKNLGIKEKEIAPLEKESQKGTDSEDEQGTDDQVNQLQRMFETEQQTPYQVNKISSYKKKLVYNIPAKP
YYHRQTPVDLQLEQHDDYMTVQFDGRSINEWNIDGMSEYQIQTVIHYMTMFATACKSNGNSDQNIAKIII
QGFTGQLKGWWDFYLPEEAKAHILQAVKTEMVNNQPINTNDSVNTLLYTIAKHFIGTTSLLLDKTQEQLM
NLRCHNLSQFKWYKDVFFSKVFTRADSQQDFWKEKFLSGLPHFFAEKIRNRIKQKHNGVIPYSLYTYGDL
ASEITSEGINLCNEIKLHRQIQKDKILGKKIIGDFCEQMGLPPIRSETSEKKKKTKINKFSKNKYFPLKE
KREKKRSKDHKHGTNSAQPSKQKTTPVCWRCHKVGHYANKCKMKKKINSLSIDEGLKKTLEKLFLSDSED
DKTNLQVSLIENENEEYESDSNQSEIESEKSDCEGNCDYYKTLCQANGLFVLTKEDNFILDIIDKITDPT
EKREILQKYLENYSKKGNIDKEFRFKEPEAYNIKEILNRVKNSEEKPEDTCISELIYEVKELKTELRSLK
SRIAVLELKRIQNISDQSEEEEDLEPSPTTSQEKDGLNSLTYINMIDRVITHKWHIKVTIIVWKEYSFSA
IAMVDSGADLNCINEGLIPSRYFSKTSEILNAADGRKLIVKYKLQNTAICNNGICIEMPFIMVKNLSHDI
ILGNPFLHMLYPIKNVDEKGITSIVKSQEITFQFTTQPRYHEIDVLQKQIKRKESFLNSLTKEISYKKIA
EKIQQPDIQKKIQEIQEHIVQTICSDIPNAFWERKKHIVHLPYEPDFKESQIPTKARPIAMGPEYLEMCK
KEIEDLLKKGLIRKSYSPWSCPAFYVNKNAELERGVPRLVINYKPLNKALRWIRYPIPNKRDLLNRLYTA
KIMSKFDMKSGFWQIQIAEEDRYKTAFTVPFGHYEWNVMPFGLKNAPSEFQNIMNDIFNPFTHFCIVYID
DVLIFSESIDQHIKHLKAFINATTKAGLVVSAKKIKLFQTETRFLGHNIKEGTIIPIERSITFAEKFPDE
IKDKNQLQRFLGSLNYIADFYTNLAFDTKPLFERLKKNPPEWTHVHTEAVRKIKAKIKEIPCLALPHPNA
FKIVETDASDLGYGGILKQRINNKEILVRFTSGVWKGPRINYSTVKKEILSIVLCIQKFESDLLNQKFLL
RIDCKSAKDILQKDIKNVASKQIFARWQGILSVFYFDIEFIKGSDNCLPDFLTREFLQGQNE*

>NbenV_sc1 endogenous-virus 7887 bp lcl|Sequence 1 ORF:512..6019 Frame +2
MNQNILNTVNLTSRASQIALTESNLDNWSIPEEPFHKIYQIGHFNFIKKHNIKTCESTVAINNSLEVIKL
LNEQDIIRYKSNFNYLHIGLVQVAVKPLFRKGLNIPVCALLRDARFLNFDDSLLGALESNLAGGPVYFNC
YPNFSVDINDPNVLDTLTLNIKTINMNSKSETRELAVIYRVYYRLMATTLAPRARIESTKGVTMLMEANH
EHSTVFVPRLLKWNDLLANTDWHFEAITQPVSSHTEKRQIERIIQNSDGSVDLKFLDSRPRRSFTAGSTS
SKPPEGVFNRSYSFRSADKSQVDGVDFSGEIPKVFYKPQVQEPSSPTASDMEPPRQYSDPGLGVITTDED
YTPDLASLKKLWLDPKNRLKVKWYSATYSQSQQALFGKQWISDMKRLKCDIEFFRWFEITGKLDDQNESL
QVLVNKWYTQSSKVVESVTPPLEGIKIPHSNILVPASPFKLKSSNPQSLPSNADIDKIVEQNNYTNKLLH
TVSLQIEETNPKLVFSAPSLSAPRPSTSSTIEPNPIFKPPEFRRELFPKLSNDIAVSGKLVEQITEKLAH
FHVSDKSKAKASSVSDSPSTKENKASSTKENEASLTKENKASTSESVQTLSDNSLHKLSDRYPNRRNYYK
RPSFPDTQYEEDGFQSQSSHDGRGIVEWNIDGLAEHQIYRVLHEMGVCITSYKLRNSSDKEAAAMITAGF
TGMLRYWWDNYVTEELKHHILNATTIITTIKTNSGMETQESETREDACATLLYHIAKHFVGEPKLFQDRS
LEILNNLRCPKLSDFRWYKDQFMVKIMTRPDCNSDFWKDRFISGLPPLFAEKVRSKIRDRCGGKVPYDQM
TYGDIISLINTTALELCTDLKLKSHLKKDRMTSRAELGSFCRDFGYGNIDPPPSKLAKKKSKKSSYKSKK
PRKNTSKDRPYQPKKKFRKHRPSHKEDVCWNCGKSGHRANQCKSSKKKKKINLLGLDDDTKEKLFSILQE
SDSASNDTSSDEYSDEENINVAYETDESQSEQDDSCEESCEGIFCDCNSNTISTITEDSKEVLFDIIDHI
KDDESRTKYLAELKKIILGSDQKKPSHSKVIEPFSMKQVFSRFDKSAEPSVSDLRVEMNSLKQEVRNMKS
RLDKIEIEALTSQVLREVPATDKGKSVSILEPTSNFPGELIDPGLLDPGLQKEASPVGPSVSTIKSISQH
IPIKLVIAKDFVLNKIALFDSGADRNCIVKGLIPLKYLEKGTTRLYSATGERMKIDYKLSKAHICNNNIC
FTNDFVITENINEDIILGLPFIYQLKPYTDDLDGIHACILGQKVFFPFVKSLSPEESLFVKNKTVFKINR
LSNHISFLKEEIKIEKIKQALKTPGMVAKIDSLQQKFEREVCSNLPTAFWNIKRHSVALPYIDDFDERSI
PTKARPIQMNQEMLETCKTEINHLLENGIIRPSNSPWSCSAFYVNKSAEKERGAPRLVINYKPLNSVLKW
IRHPIPNKRDLLKRTYKANLYSKFDMKSGFWQIQIKNEDRYKTAFNVPFGHYEWNVMPFGLKNAPSEFQN
IMNNIFNPYSYMSIVYIDDVLIFSEDIDSHFKHLNTFFNVVKHNGLVVSAKKIKLFQTTIRFLGHDLYQG
SYKPICRAIEFSDKFPNEIKDKTQLQRFLGSLNYVADFIPNIRQVCEPLYKRLRKNPSPWSDEQTEAVIK
IKKIVKNLPCLGIPNPEAFMIVETDASDLGYGGILKQCISPEKGEQLVRFTSGVWNSTQKNYSTVKKEVL
SIVLCITKFQDDLVNKPFLLRVDCKSAKEILFKDVKNLVSKQIFARWQALLSSFDFEIEYIKGENNSLPD
FLTREFLQGHEALKT*

>OsatBV_compBsc1 endogenous-virus 6651 bp lcl|Sequence 1 ORF:374..4609 Frame +2
MSWLVRSRRATDQSVASCSSEKSVGTMSIKNASSISFEDIEKSISNWKIPKVNIKEIYHVGTFSLLSNYY
IKTIEKTIPISSLHETLHLLSEREINSIRAKHQYHYLHFGLIQVAIRSLTRKGLNVSVLACLRDCRNKRF
KDSLLGMVEASLSNGPIYFNTFPDFSVSLSDKNIHKVLTLNLQTSSYELEPGSENISVTYRVYYKAMTTL
APCAKHYTPKGLTTLLQTNPNNRHTTPKTLKWDEITLPEKWVLSQAVEPKSMDQSEVESLIETPDGDVEI
TFASKQKAFLQSRPSVSLDSRPRTKPQNVVYATYEDNSDEPSISDFDINVIELDVGFVIAIEEEEFEIDK
ELLRREIRLPKNRTKTKRYLEEVDKSFRMKIREVWHNEMREQRRNIFFFDWYENSQIIYFEEFFKTQKKG
KGVCNEERKQEHDKSVIKVFSDYGSTSKTYITYSPFKLTQQSQDIRGKNCFPESTYEKSIENNFLEYLVE
QQKTQDLSPEQQDSKTIPMEPIILRSHEEPSSHSQFEVSRPQSETYLLPYSYPITTILIPTATPKDKVAK
FFDIPNNFPNTNDQMSNSLTKIQASSYDKLTLQKEVSSFYNKIDSSVNRNLESYITRIINTSFYNIINDP
KGITRSKFRLFHNVLFSKIYIQPNPNKTLCYHSQTKNSFERKSQNQISAEALCTNNEILVHKQDLFGSIF
VISDTNQFGTFNPEEERTKRKLKINDLFQEQNYTKKELRDLKGKIRSLELQNNSCMGQDEEVVNSINSYV
KQKWYAEVRYKFNDGFQFSYKTLIDSGADVNCIREGIIPFKYFEKSSHKIHAADGNLLKVNYKIPSIHVC
INGVCIKTSFLLIKNLKQGVILGTPFLSLIKPFIVTEKGIQFRIRDKNVKLKFSSKPEQTMLNYLKEIIT
QKEQFVSDISSEIKNARISQTLNDPRFQEKIILLEKRFIKEICSDFPSAFWHRKKHVVGLPYISNFNEDK
IPTKARPIQMNSRLLEICKQEIKNLLDKGLIRKSSSPWSCAAFYVENAAEKEQGVPRLVINYKPLNKVLQ
WIRYPIPYKHDLIRRIQGSKIYSKFDMKSGFWQIQIKEEDRYKTAFTTPFGHYEWNVMPFGLKNAPSEFQ
KIMNEIFLPFTSFIIVYIDDVLIFSQDVDQHWKHLNIFYKIIVQNGLVVSAKKMKLFQTNVQFLGYKIQY
DQVQPVARVIEFAEKFPDEIKDKTQLQRFLGCLNYVSDFYKDLAKDRKILTERLKKKPPAWTAKHTQAVK
KIKGKVKTLPCLYILDQDAFKIIESDASDHGYGGILKQKKDSKEQLVRFTSGTWNEAQKNYSTIKKEILA
IVKVISKFQGELLNQRFLLRIDCKAAKDVLQKDVENLVSKQIFARWQAILSCFDFEIEYIKGELNSLPDF
LSREFLQGYGT*

>PtrichV_sc1 endogenous-virus 7866 bp lcl|Sequence 1 ORF:184..5751 Frame +1
MDSVFHRTTSISASSTSESSESRRIVQSEEITIEDFTKNIDDWKIPKISQTQIYQKSKYDIFKTDFTIKT
EERDIQLTKPFETIQLLSQKSLQKHLARNYKYIHVGLVQVGIKPLTKEGLNTSILAVLRDARFQNFQDSL
LSSIESSLCSGPVSFDCYPNITISLKDKNILQSMLLQIKTHNYDMLEGSIPVALIFKIHYKAMFSAFASK
HKFQSQKGETLLLQTDLSRSNTVVPKAIQWKDISLPEDWILEGAAPPELPQPPQPNVQIKNITQYTDGKV
KLSFHRHSTSSRFSEDSSSSSTIDLGRISKIPSVINIPYHANPPRKSTSDIPSTSFQNADYTTNIPKPVY
TDLEQPSPPTSPTFSAVTENIQNELNVLTSEKHFVINKTLFKRDFYGDHNIEKRSWFFQHFLQQRNDIQK
QFYAYIETHKVQILFFDWFEFHYVPAQHITYPFASIKHACPITTRSKTPTWTLTSGPTVESDHPPLRNIQ
LTHKDQTVDAAPYKLPGEDTLTNTKHIIQQNNFTNTNLHTIGKQLTRLEKQIQKNPVHFMTDKNPIDLKL
KNPVFKPYQVTKTSQAQIQENQTDFLRAIKTHLQNLDRTTLTVPDTPQQSNPSSSTNQVNTLQNNPVSTS
DTDTFQEQPLQLNRLTWQAPKTTIAPDISISTEPTVISQHKYNASSLYEWNIDGMSEYNILNTLQQMTMA
ANAYKTQTGTPDKAIAELLIAGFSGQLKGWWDYHLTETDHLHILNSIQTYEDQTPILDPSGNTIQDVVST
LILTISLHFVGDPSHLKDKNAELLSNLRCKKLSDFQWYKNTFLTRVMLREDSNQPFWKEKFLAGLPILLG
EKVRNKIKDTFTTKTIPYDQLTYGELVSFTQKEGLKICQDLKLQKHLKWEMKRTRQELGSFCHQFDLSTK
KPSCSGTCSQPKKYSSQKPPYKRSAHKYRQQFYSKPDQPYYKKPYKFTKPHRPFQSKPKPKFDPKNITCY
KCNQKGHTSRFCKVNTKLHELQIDEDTINQIQNLYIEATDTDHSPSDTSEEEFQIDEIVTTSATSDASTN
SKQINVLTQDQEFILEAIKRLDDPHLQKTYLDKLLKDFNQPEHPPSNPPNRSILPSTSTNTYDLTKILNK
KKSKTTVTIPELHSEIKTLKSELQTLKQAQQKDSAILQHLLSKIESQSDTESEPEDQTIESHALPHTLTN
IEHIPDDFLNVLTQISSKKYLIKITLIFSEDFKLDTIALFDTGADLNCIKEGVVPKRFLQNTSEKLSAAN
NSKLHIAGKTQASVFNKGISLKTFFVVTKDINHTIILGTPFIDMITPYQAHHNCITSKINSIKLVFPFLE
KSKTRNLNLIKACSIHTYHINALIHGKQFHLHDLQNHVSFCRINKQLQNSDLQKKIIDLQNKIEQQICSD
LPNAFWKRKQHIVDLPYEDTFSEKLIPTKARPIQMNADLEQHCRLEIHDLESKGLIQKSRSPWSCAAFYV
NKNSEIERGTPRLVINYKPLNSALKWIRYPIPNKKDLLQKLHSAFIFSKFDMKSGFWQIQIDPKDRYKTA
FTVPFGQYEWNVMPFGLKNAPSEFQRIMNDIFNAHSKFCIVYIDDVLIFSHSIDQHFKHLHTFFHTAKQN
GLVVSKTKISLFQTRVRFLGHYICQGTVTPIERSLTFTNKFPDKITDKTQLQRFLGSLNYVLDYYPNISR
LAKPLHDRLKTNPIPWSDLHTNLVKQIKKQVQTIPLLHLANPLAPKIVETDASDLGYGGILKQVQDNKEQ
ILQYTSAHWNDCQKNYSTIKKEILSIVLCITKFQSDLLNQKFLLRVDCKSAKEVLQKDVQNLASKQIFAR
WQAILSIFYFDIVYIKGDSNSIPDFLTREFLQNRS*

>RcomV_sc1 endogenous-virus 7867 bp lcl|Sequence 1 ORF:202..5748 Frame +1
MNLEPFFCRSSSFSNSSTSESSRYKGLVNSEEITIEDFSKHIDDWEIPKVQKKQIYEFSKFPLFKTDFTI
KTEERDIQISKPFEEIYLLNPKTLQKHKEKDYKYIHIGLVQVGIKPLTREGLDTSILAVLRDARFTNFYD
SLLGTVESSLNKGPISFNCFPNITISLNDKNILKSIVLQIKTHNYKMLEGSIPIALIFKIHYKAMISAFG
SKHKLHSPKGETLFLQTDLSKSNATIPKTIQWKDITLPEEWILEGATQPESPKQTEPNTNLKNITQFPDG
KVKLTFNRKSTSSRFSDDDSSTSTIDIGRVSKIPSVIYAPYKEPTPSQTQPRFSTSDIPSSNNILQNVDY
QSNIPRPVYNEPKKEDEDIEIVSTPSSPSPSAITQNLEAEINMISKDFQIDKKLLHEDFYSKKNHSKKLW
FFKNFLQEKDSIQERYYQFCIQNKVQIKFFDWFQIYCKENSILYPFKEKLISPVTVRNKAPEWKVGENQT
IQSEHPPLRKITIPYGENEIEATPYKLIGEDLEKNVKNIVQQNNFSNTYLNTIGKQLVRIESQIQKPPIV
FTSPIPNTDHPKEISQSEKLKNPVFKPYQISKPSQDQFQKQTEFARAVREQLSKLATSESSKNLVPDTPQ
SSRNISAIDQAQCDESNDSELESVTEKPSNINRLGWQAPRLTWHTPRNTAPDLGIENRNNILTQSRFNAS
SVYEWNIDGMSEYNILGLLQQMTMAANAYKTQSGTSDRAIAELLIAGFSGQLKGWWDYHLTQAQQLQILG
AIQTTIEGTPILDELGNPIEDAVSTLILTISLHFIGDPSLLKDKNAELLSNLTCKKLSNFQAYKDTFLTR
VMLREDSNQPFWKEKFLAGLPKILGERVRNTIREAHNGQIPYDFYTYGELVSLTQKEGLKICHDLKLQRQ
LKWEMKKTRQELGSFCNQFEYNPIEPSPTCKGKCKEDFSKSFKKKCFFKNRRTPKNKENFYKKPSSSKFP
KQNSKKDFSKITCYKCGKKGHTSKYCKFSKKLHELQIEDEILSKISALLVDSSESEFSNSEEEFQIDEIK
TSSDYSESDSEDISKNINMLTRQQEALLEAVKHINDPQIQKQVLKEILKTETLVPSSSKNTYDLTMILDK
GKKLKNPLPTVQELQKEIKAIKTELKDLKEKQQNDFVLLQSLILKQNSDSDSEEENDFQNLEVSENVPEN
FINVLKEITSRKYLIQIKLIFPGDFQIETIALFDTGADLNCINYELVPKRYHQETKERLTSANSSKIRIA
GKTEAAILNNNIALKNIFILTKDLQQTVILGTPFINLITPFKVTTAGIIFKAKDSKIVFPFIEKPKKRNL
NLIKAHSIYNFEINALIKGKQTQLFHLKQDMGLKRIQSQMQNDFVQRKISDLQKKIENEVCSDLPNAFWR
RKQHMVDLPYEKDFSDKQIPTKARPIQMNETLESHCRIEIKDLEQKGLITKSRSPWSCAAFYVNKNSEIE
RGTPRLVINYKPLNKALKWIRYPIPNKKDLLQKLHSAFIFSKFDMKSGFWQIQIHPKDRYKTAFTVPFGQ
YEWNVMPFGLKNAPSEFQKIMNDIFNPYSKFCIVYIDDVLIFSNSLEQHFKHLETFFYVVKKNGLVVSKS
KISLFQTKIRFLGHYISRGTITPIERSLAFTSKFPDKILEKTQLQRFLGSLNYVMDFYPNLNCLAKPLHD
RLKKNPPAWTDEHTKIVQSIKKQVSEIPCLHLADPSAFKIVETDASNLGYGGILKQVQNNKECIVQFTSA
HWNDTQKNYSTIKKEILSIVLCISKFQSDLLNQKFLLRIDCKSAKEVLQKDVQNIASKQIFARWQAILSV
FDFEIEYIRGDSNSIPDFLTREFLQKQE*

>JcurV_sc1 [endogenous-virus-name=Jatropha curcas virus] lcl|Sequence 1 ORF:207..5708 Frame +3
MDPFLCRSASSNRSEDSDNSEIKRVINRNELILQDFSKAIDEWEIPKVDKEQIYKVSKFNLFKTDYVIKT
EERDFQLSKPFERITLLSSKTLQHHKSKKYKYIHIGLIQVGIKPLTREGLNTSILAVVRDARFLNFQDSL
LGSVETSLSEGPISFEVYPDMTVSLNDLNILESIVLEIKTHNYKMKQGSIPIALIYKIHYKAMNSAFGTK
YKLQPKIGETRFLQTDLTKTNTVIPKTIQWKDITLPDEWILEGVVPPPVLDPVKPNVNLQKIEQFEDGKV
TLKFNRSQSMRYTGSSSSVTTDENDKPSSSIPSVIYAKYKETEPKPIIQTLVKPRYSTSDIPNKMKGVDY
SNSIPQAVYNPVDNYVNQQSNLVNSPPESPTASAITENVSDINRELNVLSKEDIEKSLIKEISKTKNLLK
MKKILKTYTFEELKYEYLDYKLNNQTEIKFFDWYKLIKENKSDKSVNPITIRDKRPEWIVNEQTIKSDFP
PKTISKLKHQDNEIICAPYKVARDNDTNSKIIEQNNFSNASLICLNSQLKRIEHMLEDKPLVSETIKGKE
TVKTHMFKPYQISQSSKQEFVNKLKDQLSKLEVHSATNQHVAPDTTEASRNINIIEENTNSDDSEPDSEN
AKQFELNPINHHREIVNRAPDLGIIDKPNTISQFKYNASTIYEWNIDGLSEYNILSILQQMTMAANAYKT
QSIISDKAIAEILIAGFTGQLKGWWDYHLTEQQQLEILNSIQVNDEGEPIYDENGEVIQDAVSSLILTIS
LHFIGDPSHLKDKNAELLSNLKCKHLGNFQEYKTTFLTRLMLREDSNQSFWKEKFLAGLPYFLGEKVRNN
IKQQYGQPIPYSKLTYGQLISIIQKEGLQICHDLKLQRTIKYEMQKTKKELGSFCKQFDYSLKSPQKCDG
QCLRTHKSKKQYKNKYYKRQYRSTPSQDKFYSKEKYKPHRKSKRKQQAKNSNKTSYKDLTCYNCGKKGHT
SKFCKFNKKLNELHLDEEVLNKIHELYLDSDSSESEVIESENQIDELGTTTSSSDYSINMLTKDQSTLLE
VVNSIDDQDTKAKLLQKLIKSFDETQIVKEDITPKIQHNTYDLTTILNKNKHKKVEAENSTSNLKNEVRN
LKKEVSELKRQFQLHDRLIKVLESQLISSSSSDEAEPDKDEINQLDEDVDSNFLNLLQEITSRKYLVKIN
IQVNDFVIDAIALFDTGADLNCIKSDLIPKRYWSKTNEKLSTANKSKLEIIGKTDAQIVNQGLEINTVFL
LSPQINYMVILGTPFINLITPYSVKEDCIKFKIRNSTVKLEFTEKPKKKQLNLLKAHSIKILEINSLIKS
REEDLKDARNNMCLNKIKQQLETKEIQDKITTLKESMEKELCADHPHAFWDRKQHIVDLPYEKDFDEKTI
KTKARPIQMNPELIEHCKNEIQDLLNKKLISKSRSPWSCAAFYVNKNAEIERGVPRLVINYKPLNTALKW
IRYPIPNKKDLLKNLYKANIFSKFDMKSGYWQIQIDPKDRYKTAFTVPFGQYEWNVMPFGLKNAPSEFQR
IMNDIFNPYSKFCIVYIDDVLIFSTTLHEHFTHLKTFCMVIRQNGLALSKTKMDLFKTKIRFLGHYIEQG
KIQPIERTLVFGEKFPDEITNKLQLQRFLGCLNYVIDFYPNLNCMLKLLHDRLRKNASPWTDKHTQIVQK
IKSLVKEIPYLYIPNPTAFKIVETDASDIGYGGILKQQLDGKERIIQYTSGHWTPAQLNYSTIKKEILSI
VICINKFQSDLLNQKFLLRIDCQSAKDVLQKDVKNLASKQIFARWQALLSIFDFDIEFIPGNKNNIPDFL
TREFLQNNGQEKG*
